# Supplementary material
Source: PubMed Central journal article supplement (PMC4545498)
Supplement: NIHMS713174-supplement.pdf [file NIHMS713174-supplement.pdf]

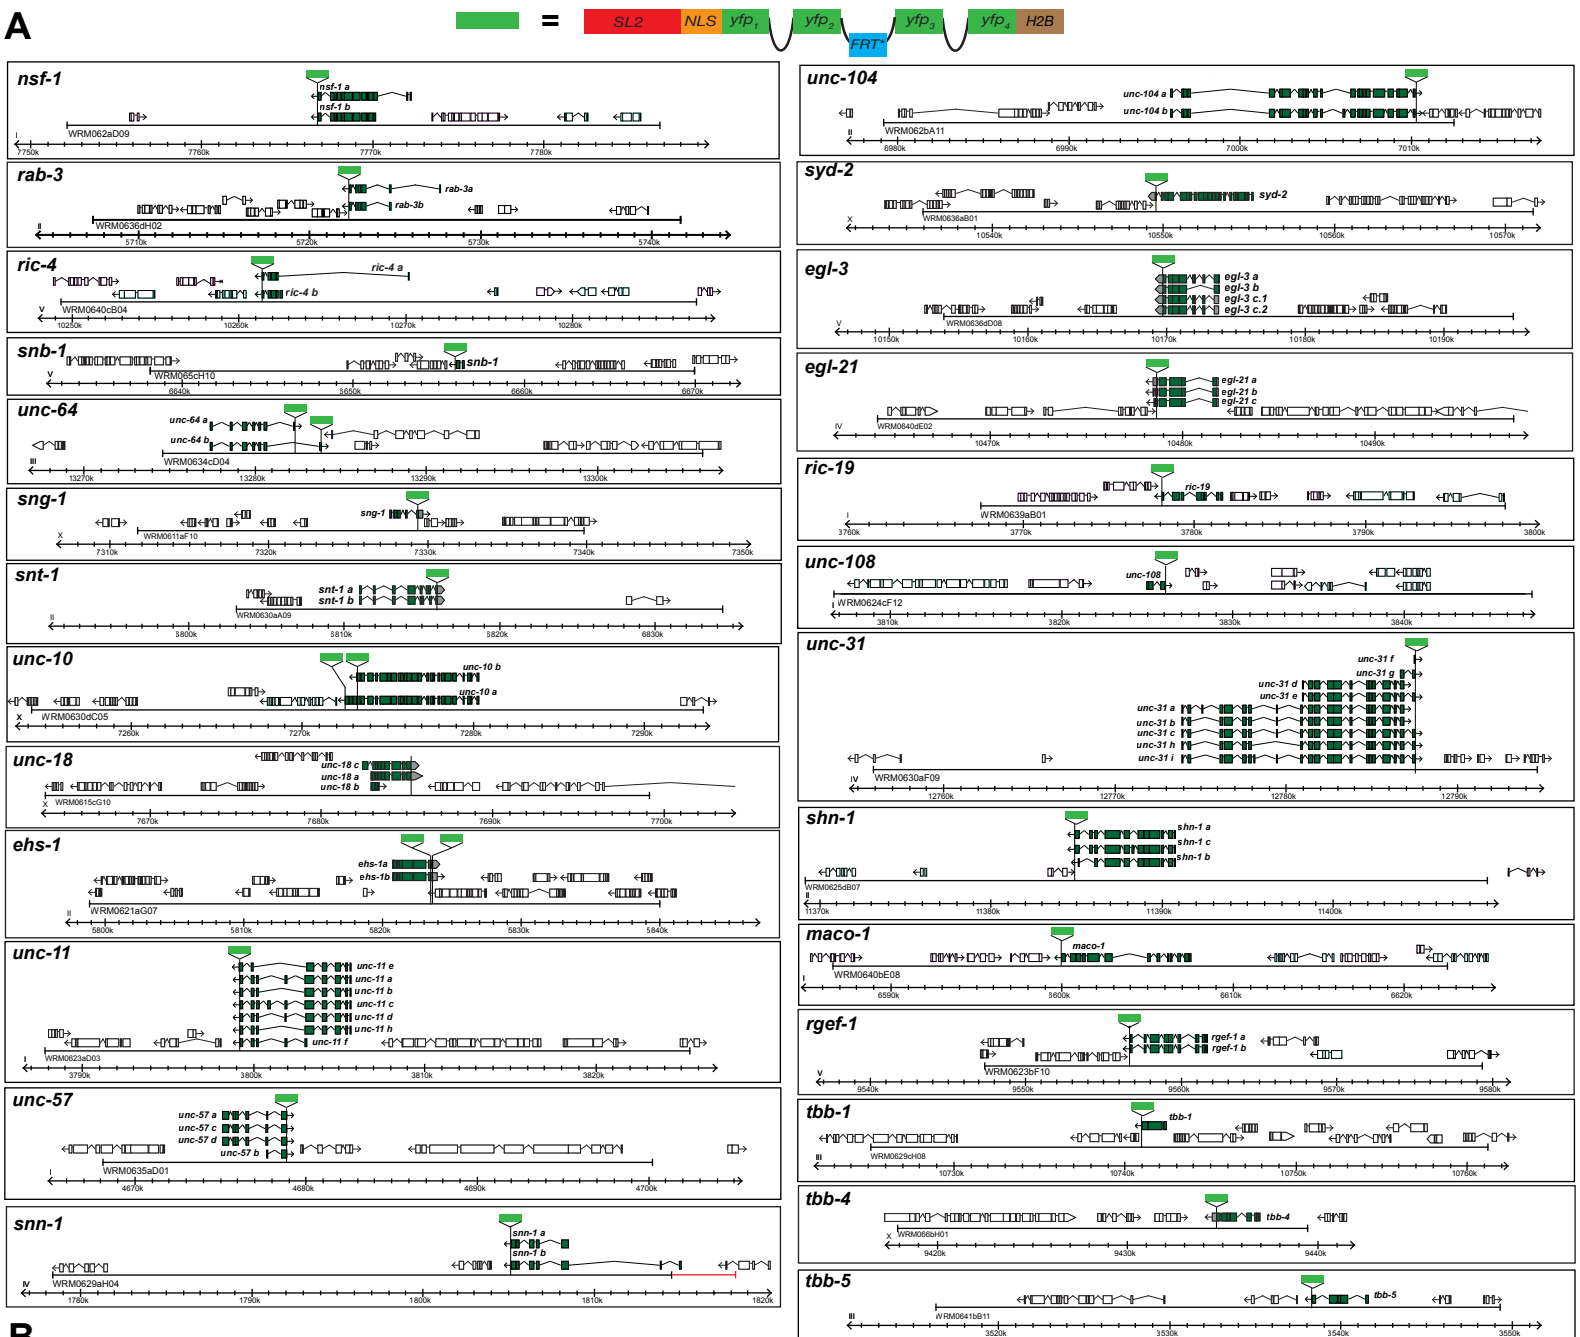

Figure S1





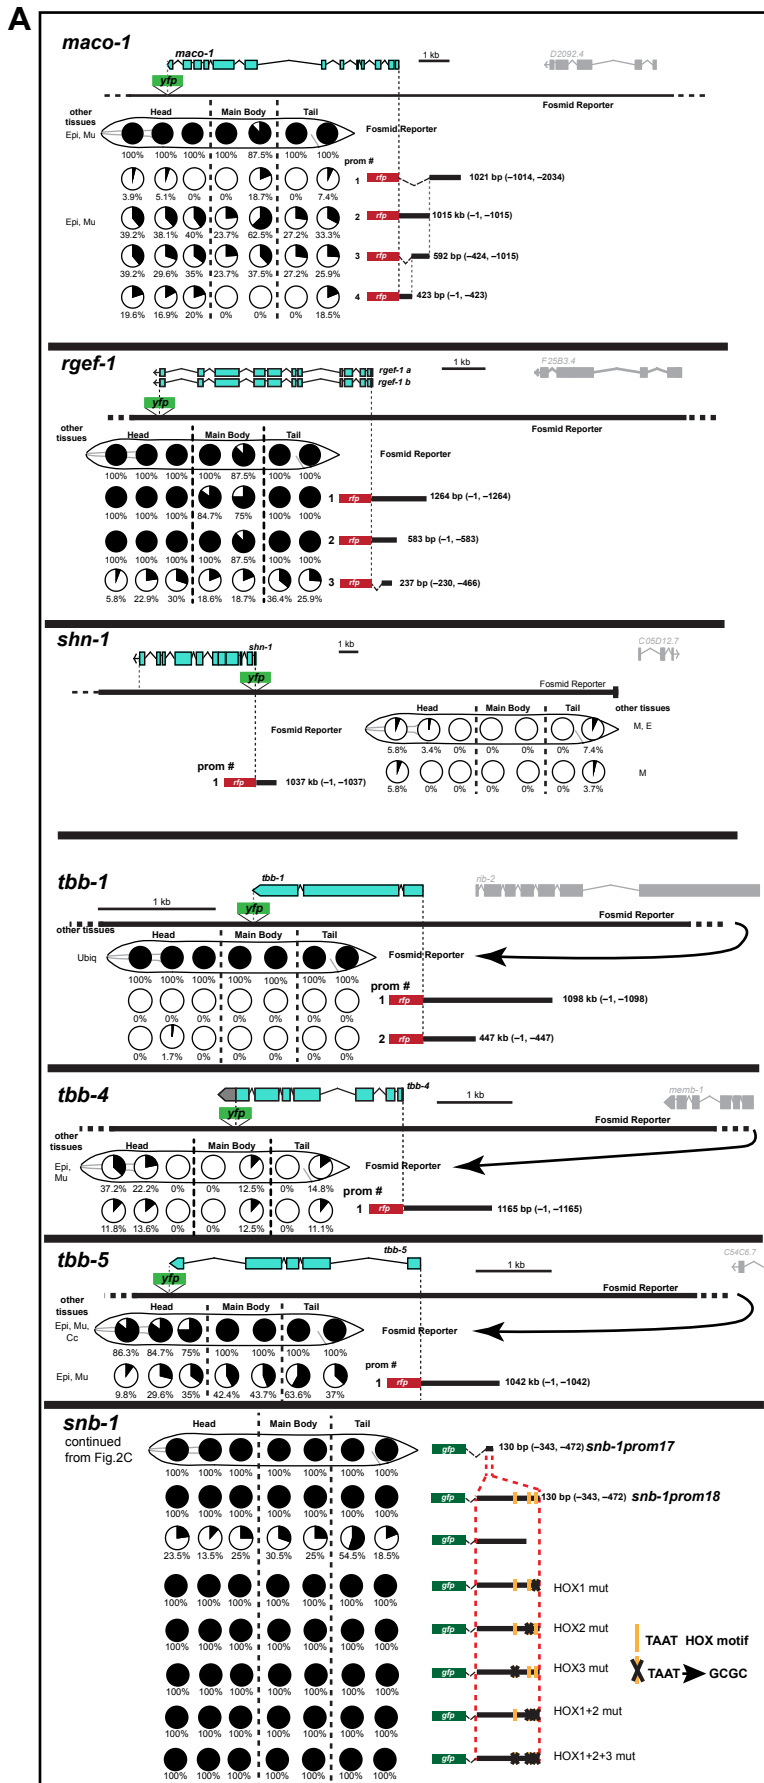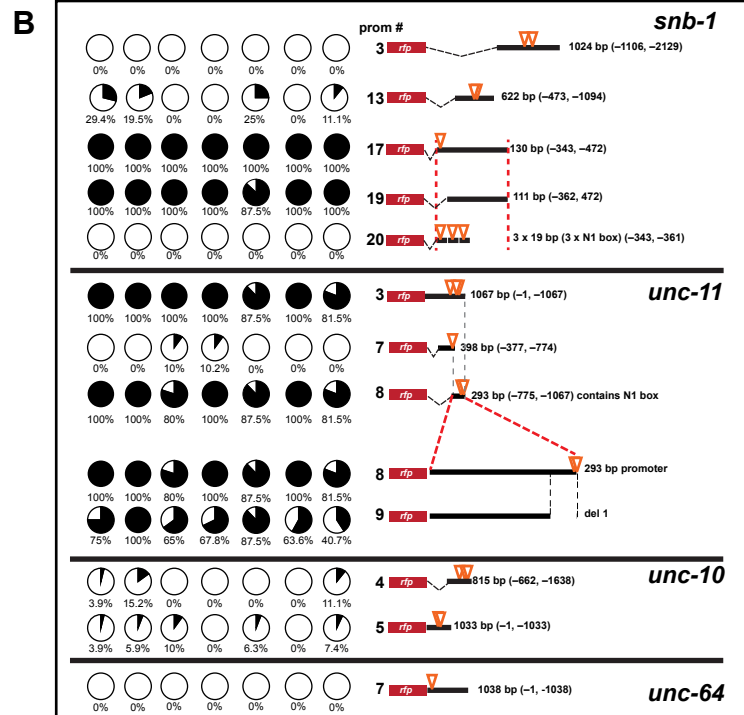

**C**

| Rank | <i>C.elegans</i> Hit | E value | reciprocal best homolog |
|------|----------------------|---------|-------------------------|
| 1    | BLMP-1               | 7e-26   | human PRDM1/BLIMP1      |
| 2    | EOR-1                | 2e-25   | human PLZF              |
| 3    | Y55F3AM.14           | 7e-20   | human ZNF658            |
| 4    | F47E1.3              | 2e-19   | human PRDM14            |
| 5    | FEZF-1               | 2e-19   | human FEZF-1            |
| 6    | CHE-1                | 2e-18   | Drosophila Glass        |

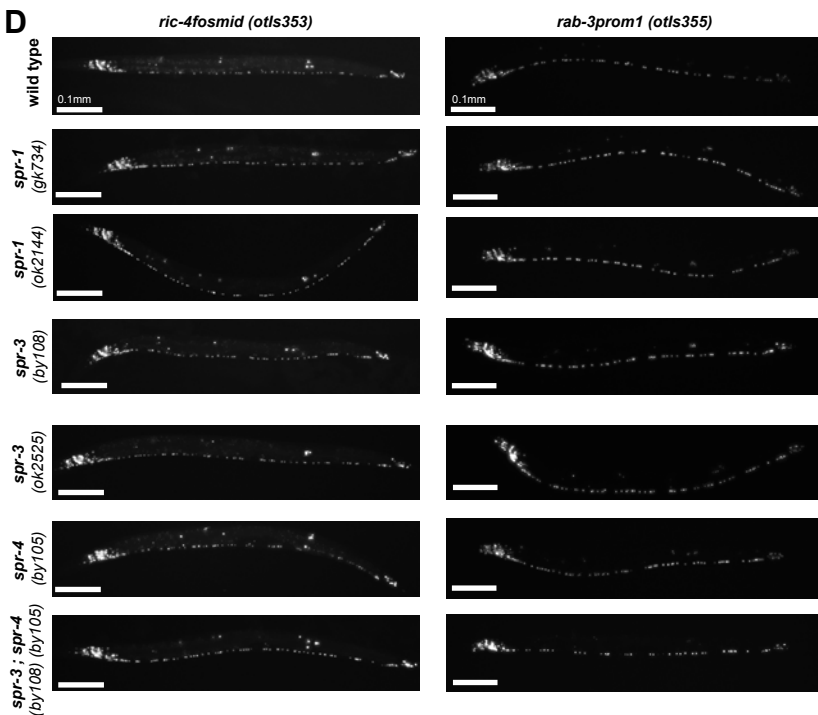

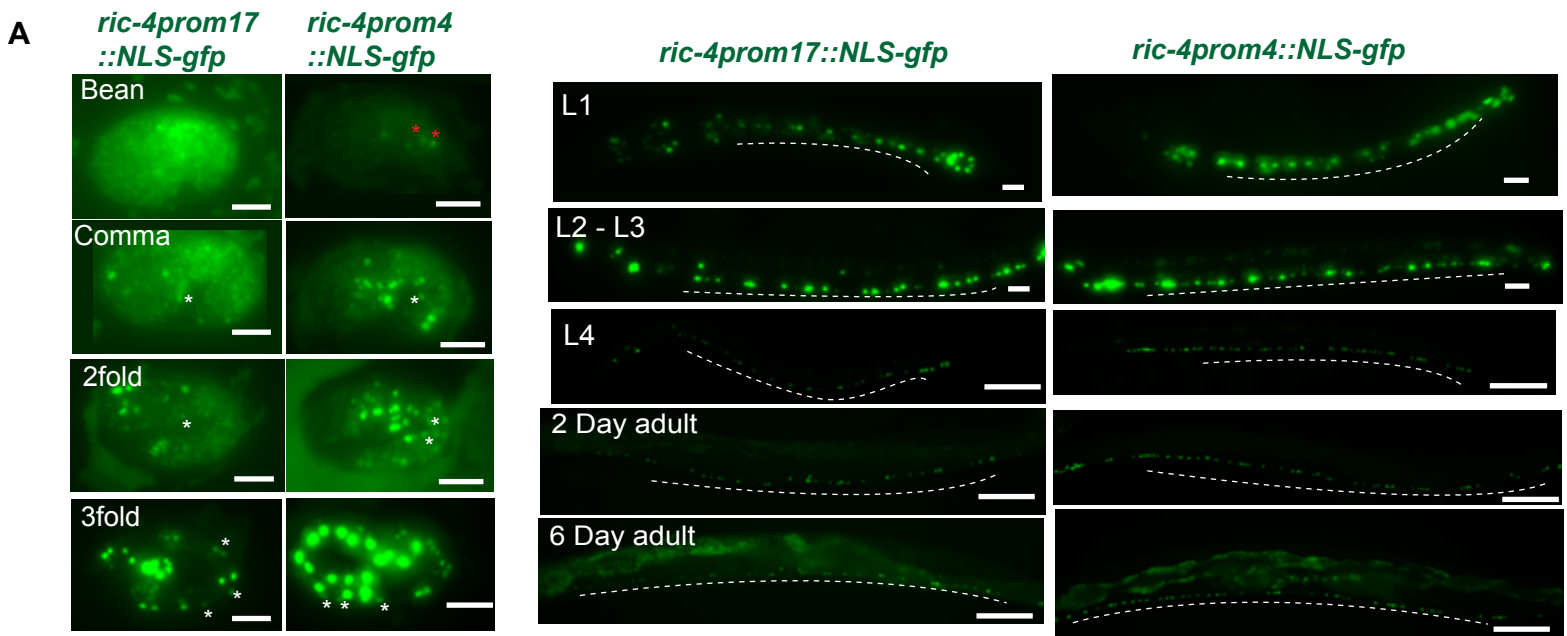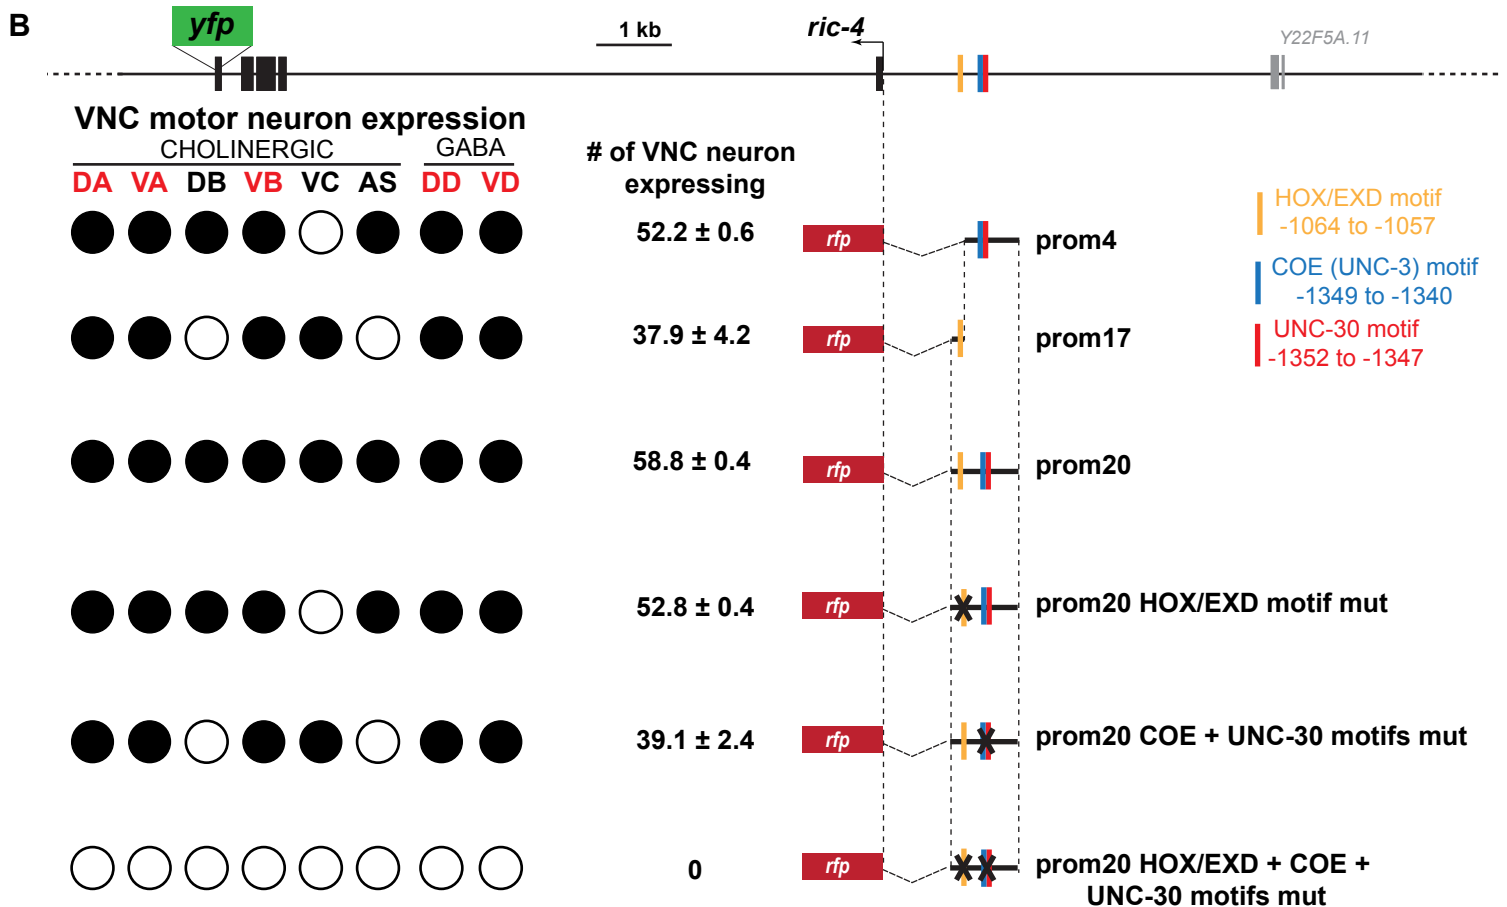

Figure S5

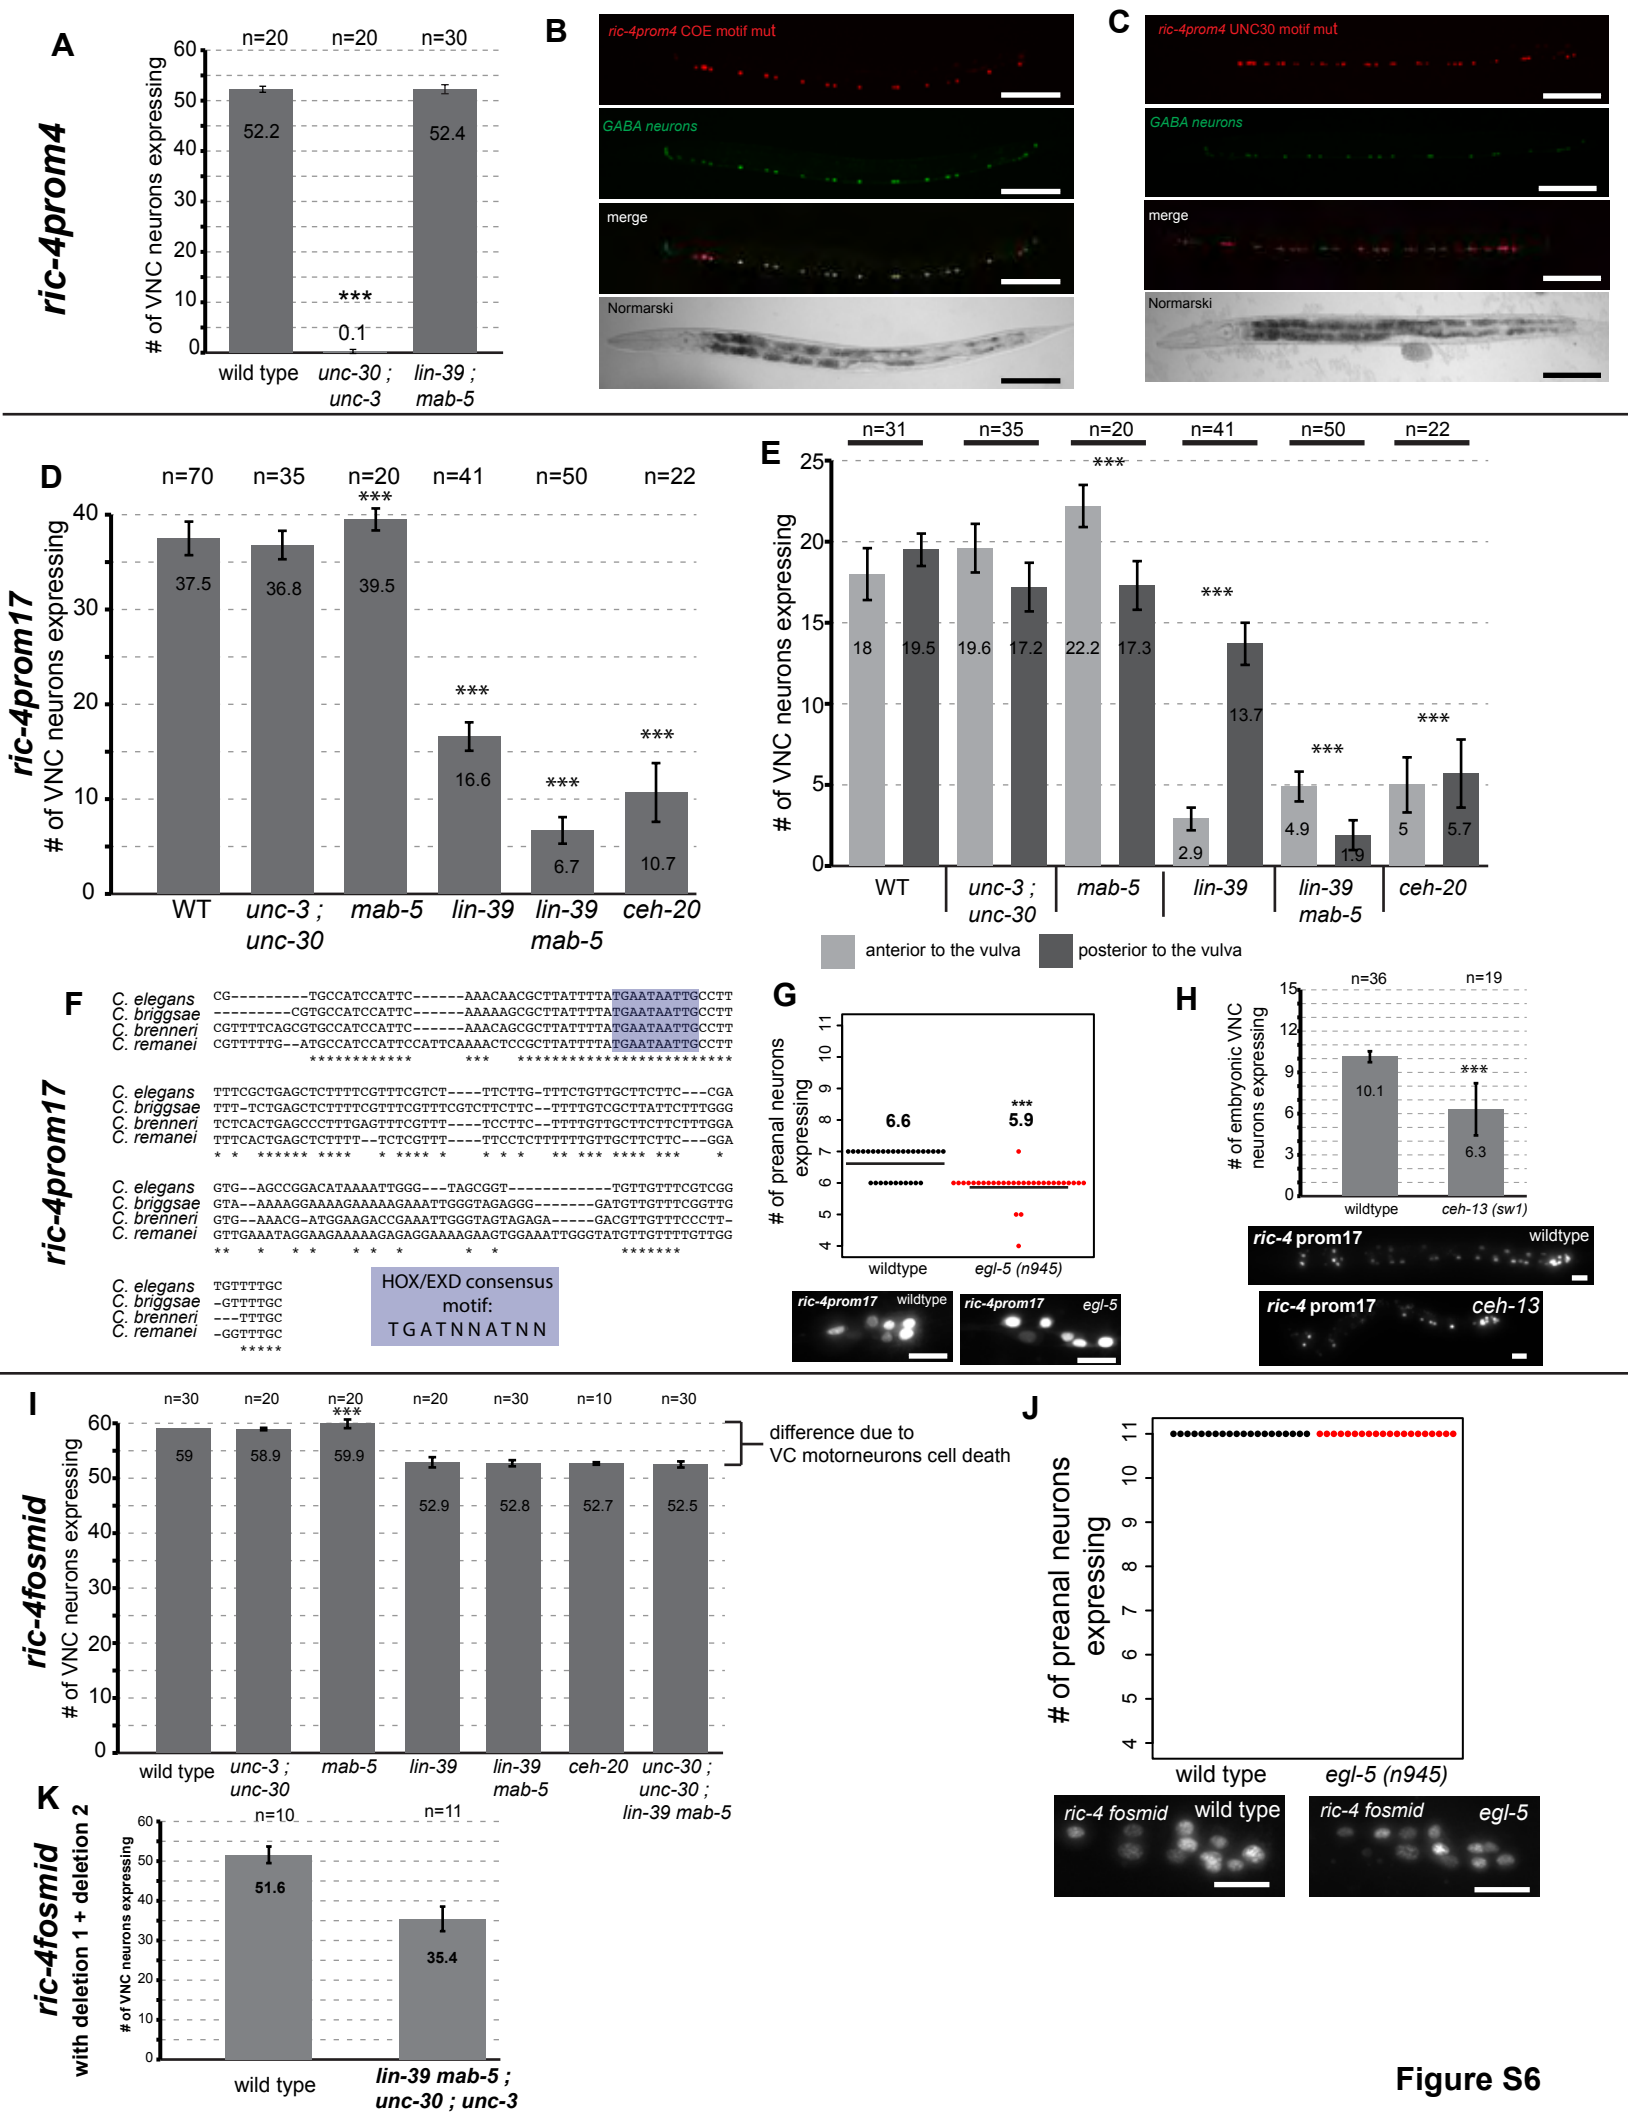

Figure S6

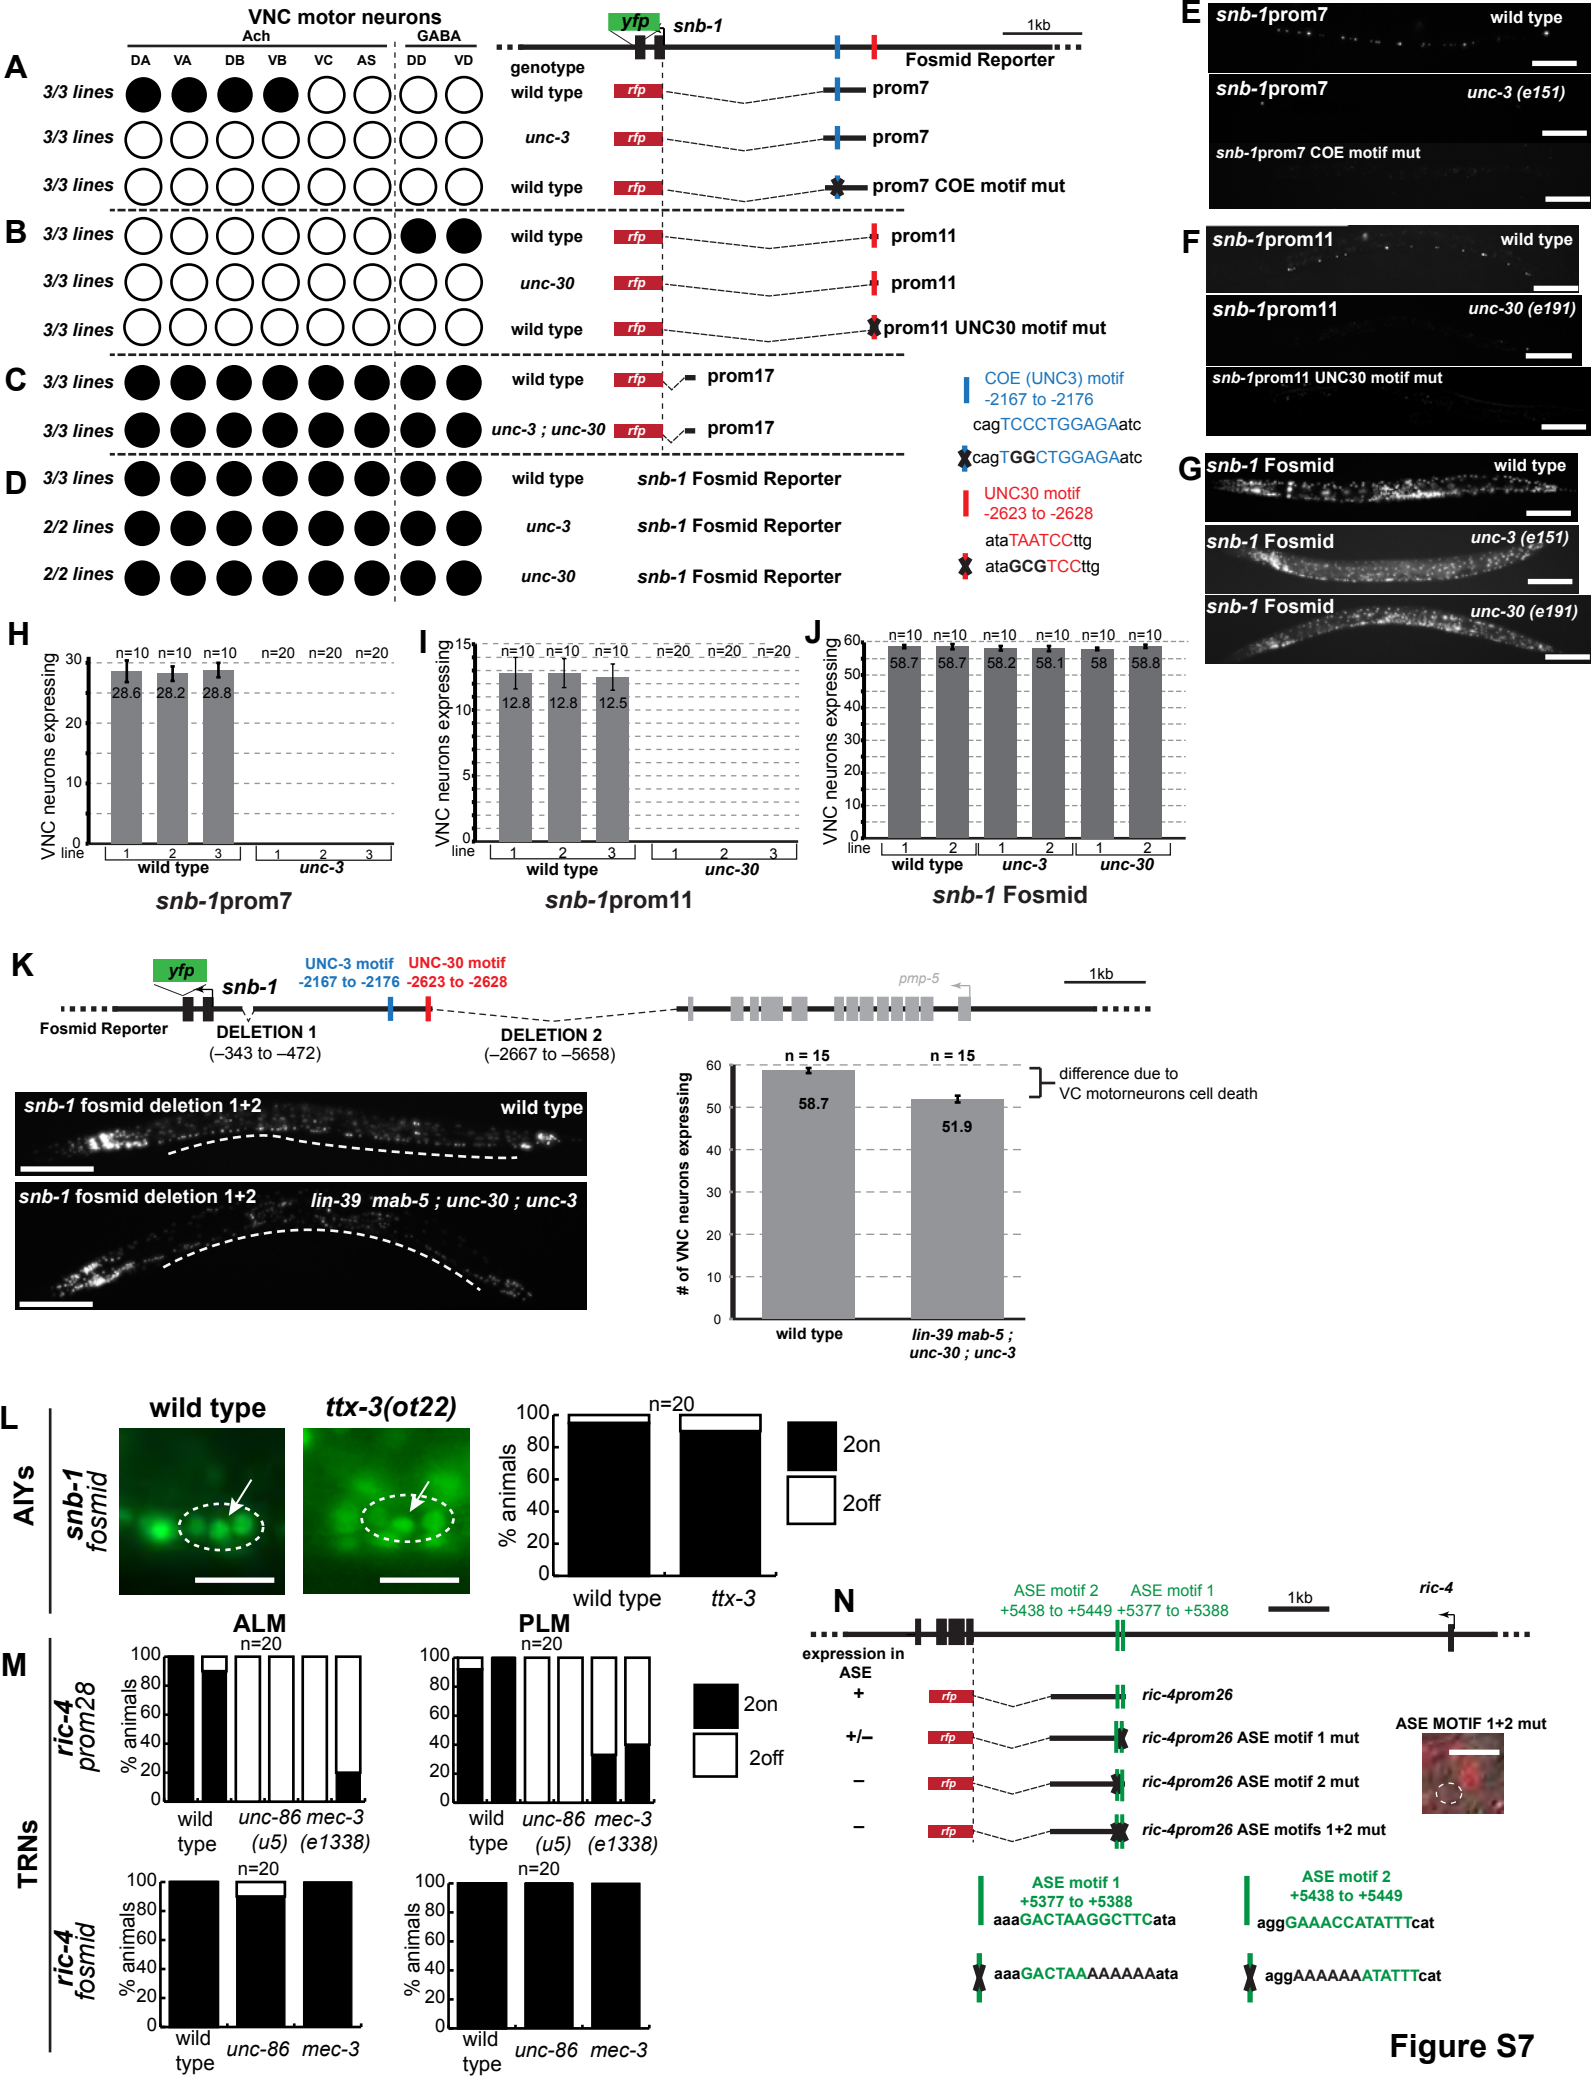

Figure S7

## SUPPLEMENTAL FIGURE LEGENDS

**Figure S1, Related to Figure 1. Fosmid reporter constructs for the 26 genes of this study.**

**A:** Schematic representations of the tagging cassette and the fosmid reporter constructs for all 26 genes. Our tagging cassette contains a NLS signal and a histone tag (H2B) for nuclear localization, a SL2 sequence for trans-splicing (Tursun et al., 2009), and intron containing YFP. After successful recombineering, a “FRT\*” scar remains in one of the introns of the YFP. **B:** Fluorescent images of L1 stage worms and fosmid reporter schematics are shown for each gene. For *snb-1* fosmid reporter (**C**) and *unc-31* fosmid reporter (**D**) images of head neuron expression and intensity level variability are shown the same way as in **Fig.1D**. Scale bars are 0.01 mm.

**Figure S2, Related to Figure 3. Modular Architecture of Cis-Regulatory Regions of Pan-neuronal Genes.** Cis-regulatory analysis for *nsf-1*, *unc-10*, *unc-11*, *unc-18*, *unc-64*, *snn-1*, *snt-1*, *syd-2* is shown. **Fig.3** legend explains in detail how the scoring data are presented.

**Figure S3, Related to Figure 3. Modular Architecture of Cis-Regulatory Regions of Pan-neuronal Genes.** Cis-regulatory analysis for *rab-3*, *ehs-1*, *unc-57*, *sng-1*, *unc-31*, *egl-21*, *unc-108*, *ric-19*, *egl-3* is shown. **Fig.3** legend explains in detail how the scoring data are presented. 29 scanning substitution constructs were made to reveal the modularity of the *ric-19* *prom6* 147bp element that still drove pan-neuronal expression. Alignment of *ric-19* *prom6* sequence within four nematode species is also shown.

**Figure S4, Related to Figure 3. Modular Architecture of Cis-Regulatory Regions of pan-neuronal genes and evidence against REST (model#1) and N1 box (model #2) as players in the regulation of pan-neuronal genes.**

**A:** Cis-regulatory analysis for *maco-1*, *rgef-1*, *shn-1*, *tbb-1*, *tbb-4*, *tbb-5* and continued *snb-1* from Fig.3C. **B:** N1 box is not a master cis-regulatory element for pan-neuronal gene expression. Examples of the cis-regulatory analysis showing that the N1 box (Ruvinsky et al., 2007) is neither sufficient (*snb-1: prom3, prom13, prom17, prom20*, *unc-11: prom3, prom7, prom8*, *unc-10: prom4, prom5*, and *unc-64prom7*) nor required (*snb-1prom19*, *unc-11prom9*) for broad neuronal expression, excluding its role as a cis-regulatory element that



binds a master regulator transcription factor for pan-neuronal gene expression. **C – D:** The *C. elegans* REST/NRSF functional homologues have no effect on pan-neuronal gene expression in *C. elegans*. **C:** *C. elegans* genes with highest similarity to vertebrate NRSF/REST. Shown are the results of a BLASTP with human NRSF/REST against the *C. elegans* genome. All the top hits are genes that are the orthologs of other genes; in addition, SPR-3, SPR-4 Zn finger proteins claimed to be REST homolog (Lakowski et al., 2003; Lu et al., 2014) do not pick up NRSF/REST as top hit. This indicates that in spite of previous claims (Lakowski et al., 2003; Lu et al., 2014), *C. elegans* may not contain a true NRSF/REST ortholog. However, SPR-3/4 do act similarly as SPR-1, the sole clear ortholog of vertebrate CoREST (Jarriault and Greenwald, 2002). The existence of CoREST in *C. elegans* is not indicative of the presence of an as yet unidentified NRSF/REST factor because CoREST is part of a broadly employed chromatin modifying complex (Laugesen and Helin, 2014). **D:** The *ric-4fosmid reporter* and *rab-3prom1* reporter show no derepression of expression in non-neuronal cell types when crossed into *spr-1*, *spr-3*, *spr-4* single mutant and *spr-3 ; spr-4* double mutant backgrounds. *ric-4/SNAP25* is a confirmed target of REST/NRSF in vertebrates (Bruce et al., 2004). Fluorescent images of young adult *C. elegans* hermaphrodites are shown. Scale bars are 0.1 mm.

**Figure S5, Related to Figure 5. *ric-4prom4* and *ric-prom17* act redundantly and produce coincident temporal expression in VNC MNs**

A. Expression patterns of *ric-4prom4::2xNLS::GFP* (*otIs490*) and *ric-4prom17::2xNLS::GFP* (*otIs414*) transgenes in different stages from embryo through adulthood. For both transgenes VNC MN expression starts being detected at the comma - twofold stage (white asterisks) and stays on until adulthood. Red asterisks in the bean stage of *ric-4prom4* indicate early expression of the intestinal co-injection marker. Scale bars are 0.01 mm from bean stage to L2 – L3 stage, and 0.1 mm from L4 stage to 6 day adults.

B. *ric-4prom4* and *ric-4prom7* act redundantly in the context of a larger promoter (*ric-4prom20*) that contains both *cis*-regulatory elements. Expression of these two non-overlapping *cis*-regulatory elements overlaps in the DA, VA, VB cholinergic and DD, VD GABAergic VNC MNs (shown in red). Mutagenesis of the terminal selector motifs or HOX motif separately in the context of *ric-4prom20* a larger promoter (resulting from “stitching back together” *ric-4prom4* and *ric-4prom17*), does not result in loss of expression in the VNC MNs expressing redundantly from both elements. Only when both terminal selector and HOX

motifs are both mutated expression is completely lost. Quantification is also shown as (average number of VNC MNs with expression)  $\pm$  standard deviation.

**Figure S6, Related to Figure 5. Terminal selectors act in parallel to HOX Genes to regulate *ric-4* expression in VNC MNs.**

**A – C:** *ric-4prom4* expression in cholinergic and GABAergic VNC MNs depends on *unc-3* and *unc-30* but not on the *lin-39* and *mab-5* HOX genes. **A:** Quantification of data shown in (**Fig.5A, D, E**). **B:** Upon mutation of the COE (UNC3) motif, *ric-4prom4* loses expression specifically in cholinergic VNC MNs but not in the GABAergic MNs. **C:** Upon mutation of the UNC-30 motif, *ric-4prom4* loses expression specifically in the GABAergic MNs, but not in the cholinergic MNs.

**D – F:** *ric-4prom17* expression in VNC MNs depends on HOX genes but not the *unc-3* and *unc-30* terminal selectors. **D:** Quantification of data shown in (**Fig.5B, G, H, I**). **E:** same as in panel **D** but VNC MNs are separated into neurons anterior and posterior to the vulva to show the HOX positional specificity.

**F:** *ric-4prom17* sequence alignment among four nematode species and conservation of the HOX/EXD motif (blue box). **G – H:** The HOX genes *egl-5* and *ceh-13* also affect expression of *ric-4prom17*. **G:** *ric-4 prom17* expression in the preanal ganglion neurons is affected in the mutant background of the posteriorly expressed *egl-5* HOX gene. Data are presented in a dot-plot. Black line represents average number of neurons expressing in each genotype (6.6 in the wildtype and 5.9 in the *egl-5* mutant). **H:** *ric-4 prom17* expression in the VNC MNs neurons is affected in the mutant background of the *che-13* HOX gene. *che-13* null mutants are L1 larva lethal.

**I – J:** *ric-4 fosmid* reporter expression in VNC MNs is not affected in the *unc-3*, *unc-30*, HOX and quadruple mutant backgrounds. **I:** Quantification of data shown in (**Fig.5C, K – O**). In *lin-39* and *ceh-20* mutants the VC neurons of the VNC are not generated. Therefore for the statistical analysis the average number of VNC MNs expressing the *ric-4fosmid* reporter in these mutants is compared to the total number of VNC neurons expressed in the wild type (59) minus the VC neurons (6), which is 53 VNC MNs. **J:** *ric-4fosmid* reporter expression in the preanal ganglion neurons is unaffected in the *egl-5* mutants.

**K:** Quantification of VNC MN expression of *ric-4fosmid* reporter carrying deletions of redundant VNC *cis*-regulatory elements shown in (**Fig.5T**). After crossing this deleted fosmid

reporter construct into a *lin-39 mab-5 ; unc-30 ; unc-3* quadruple mutant background, the number of VNC MNs still expressing the reporter is significantly reduced, but expression is still observed in ~60% of VNC MNs. This suggests the existence of at least three regulatory elements, other than the terminal selectors (*unc-3*, *unc-30*) and the *lin-39* and *mab-5* HOX genes, so at least 5 elements total, demonstrating the extreme number of parallel-acting *cis*-regulatory inputs for *ric-4* expression in the VNC MNs.

Error bars show standard deviation. Two-tailed student's t-test was used for statistical analysis. \* =  $p < 0.05$ , \*\* =  $p < 0.01$ , \*\*\* =  $p < 0.001$ . Scale bars are 0.1 mm in **B** and **C** and 0.01 mm in **G**, **H**, and **J**.

**Figure S7, Related to Figure 7. Terminal selectors affect pan-neuronal gene expression only in the context of isolated *cis*-regulatory elements but not in the context of the fosmid reporters.**

**A – J:** Expression in VNC MNs of isolated *snb-1 cis*-regulatory regions depends on the terminal selectors *unc-3* and *unc-30*.

**A:** *snb-1prom7* expression in the A-type and B-type motor neurons is abolished in an *unc-3* mutant background or by mutagenesis of the conserved COE (UNC3) motif present in *prom7* in all 3 different transgenic lines tested. **B:** Similarly, *snb-1prom11* expression in the D-type motor neurons is abolished in an *unc-30* mutant background or by mutagenesis of the conserved UNC-30 motif present in *prom11*. **C:** In contrast *snb-1prom17* does not contain UNC3 and UNC-30 motifs and its expression in the VNC MNs does not depend on *unc-3* and *unc-30*. **D:** Expression of the *snb-1* fosmid reporter remains unaffected in the terminal selector mutant backgrounds. Fluorescent worm images (L4 / young adult stage) and quantification of this analysis is shown in **E** and **H** for *snb-1prom7*, **F** and **I** for *snb-1prom11* and in **G** and **J** for *snb-1fosmid* reporter.

**K:** Deletion of *snb-1prom17* (deletion 1) and *snb-1prom1* and *snb-1prom9* (deletion 2) (see **Fig.3C** for *snb-1prom* constructs), which in isolation produce VNC MN expression, does not affect *snb-1 fosmid* reporter in VNC MNs in both wildtype and quadruple *unc-3; unc-30; lin-39 mab-5* mutants. This argues for the existence of at least three more regulatory elements, other than the terminal selectors (*unc-3*, *unc-30*), so at least 4 elements total, demonstrating the extreme number of parallel-acting *cis*-regulatory inputs for *snb-1* expression in the VNC MNs.

**L:** *snb-1 fosmid* reporter expression in AIY is not affected in *ttx-3* (AIY terminal selector) mutants. **M:** *ric-4prom28*, but not *ric-4 fosmid*, expression in Touch Receptor Neurons (TRN) ALM and PLM depends on TRN terminal selector *unc-86*. Coordinates of *ric-4prom28*, (+6396, +6427), have been described before (Hwang and Lee, 2003). **N:** Expression of *ric-4prom26* in ASE depends on the terminal selector *che-1* (see **Fig.6D**). Mutational analysis of the two ASE motifs of this promoter recapitulate that result, suggesting that the *che-1* effect on the ASE expression of this reporter construct is direct.

Error bars show standard deviation. Two-tailed student's t-test was used for statistical analysis. \* =  $p < 0.05$ , \*\* =  $p < 0.01$ , \*\*\* =  $p < 0.001$ . Scale bars are 0.1 mm in **E, F, G** and **K** and 0.01 mm in **L** and **N**.

## SUPPLEMENTAL EXPERIMENTAL PROCEDURES

### Strains and Transgenes

Wild type is strain N2, *C. elegans* variety Bristol. Strains were maintained by standard methods. Mutant alleles [strain name] used in this study: *unc-3* (*e151*) [CB151], *unc-30* (*e191*) [CB845], *lin-39* (*n1760*) [MT4009], *mab-5* (*e1239*) [CB3531], *lin-39* (*n1760*) *mab-5* (*e1239*) [MT7419], *ceh-13* (*sw1*) [FR431], *egl-5* (*n945*) [MT1975], *unc-10* (*md1117*) [NM1657], *ehs-1* (*ok146*) [NM1568], *mec-3* (*e1338*) [DR1367], *unc-86* (*n846*) [MT1859], *unc-86* (*u5*), *pha-1* (*e2123*) [GE24], *ttx-3* (*ot22*) [OH161], *lim-4* (*ky403*) [CX3937], *ceh-36* (*ky640*) [CX5922], *pag-3* (*ls20*) [EA81], *ceh-14* (*ch3*) [TB528], *che-1* (*ot75*) [OH13098], *ceh-20* (*ok541*) [VC447], *unc-42* (*e270*) [CB270], *fax-1* (*gm83*) [NG83], *spr-1* (*gk734*) [VC1608], *spr-1* (*ok2144*) [VC1815], *spr-3* (*by108*) [LA59], *spr-3* (*ok2525*) [RB1930], *spr-4* (*by105*) [LA95].

The following transgenes were used for neuronal ID: *otIs388* [*eat-4*<sup>FOSMID</sup>::SL2::NLS-YFP-H2B], *otIs534* [*cho-1*<sup>FOSMID</sup>::SL2::NLS-YFP-H2B (*this study*)], *oxIs12* [*unc-47*::*gfp*], *oyIs44* [*odr-1*::*rfp*], *evIs82b* [*unc-129*::*gfp*], *wdIs3* [*del-1*::*gfp*], *syIs80* [*lin-11*::*gfp*].

### Transgenes generated in this study

| EXTRACHROMOSOMAL ARRAYS |                 |                     |                                      |
|-------------------------|-----------------|---------------------|--------------------------------------|
| PROMOTER CONSTRUCTS     |                 |                     |                                      |
| Strain name             | Transgene name  | Construct           | Coordinates (in relation to the ATG) |
| OH12070                 | <i>otEx5450</i> | <i>unc-64prom1</i>  | -4295 -5526                          |
| OH12300                 | <i>otEx5565</i> | <i>unc-64prom2</i>  | -3346 -2635                          |
| OH10500                 | <i>otEx4648</i> | <i>unc-64prom3</i>  | -1796 -2761                          |
| OH10500                 | <i>otEx4647</i> | <i>unc-64prom4</i>  | 1039 -1795                           |
| OH10807                 | <i>otEx4851</i> | <i>unc-64prom5</i>  | -1795 -1414                          |
| OH10806                 | <i>otEx4850</i> | <i>unc-64prom6</i>  | -1413 -1039                          |
| OH10499                 | <i>otEx4646</i> | <i>unc-64prom7</i>  | -1 -1038                             |
| OH10502                 | <i>otEx4649</i> | <i>unc-64prom8</i>  | +154 +1198                           |
| OH12072                 | <i>otEx5452</i> | <i>unc-64prom9</i>  | +737 +1198                           |
| OH12071                 | <i>otEx5451</i> | <i>unc-64prom10</i> | +4420 +5234                          |
| OH12080                 | <i>otEx5460</i> | <i>nsf-1prom1</i>   | -1 -1145                             |
| OH12081                 | <i>otEx5461</i> | <i>nsf-1prom2</i>   | +246 +1919                           |
| OH11557                 | <i>otEx5246</i> | <i>ric-4prom1</i>   | -3774 -4958                          |
| OH11556                 | <i>otEx5244</i> | <i>ric-4prom2</i>   | -2768 -3773                          |
| OH11557                 | <i>otEx5246</i> | <i>ric-4prom3</i>   | -1724 -2740                          |
| OH11555                 | <i>otEx5244</i> | <i>ric-4prom4</i>   | -1075 -1727                          |
| OH10505                 | <i>otEx4652</i> | <i>ric-4prom5</i>   | -1 -1095                             |

|         |                 |                    |                           |
|---------|-----------------|--------------------|---------------------------|
| OH11427 | <i>otEx5178</i> | <i>ric-4prom6</i>  | -1 -1727                  |
| OH12074 | <i>otEx5454</i> | <i>ric-4prom7</i>  | -3449 -3773               |
| OH12075 | <i>otEx5455</i> | <i>ric-4prom8</i>  | -3009 -3448               |
| OH12076 | <i>otEx5456</i> | <i>ric-4prom9</i>  | -2748 -3008               |
| OH12077 | <i>otEx5457</i> | <i>ric-4prom10</i> | -4558 -4958               |
| OH12078 | <i>otEx5458</i> | <i>ric-4prom11</i> | -4187 -4535               |
| OH12079 | <i>otEx5459</i> | <i>ric-4prom12</i> | -3774 -4186               |
| OH13189 | <i>otEx6082</i> | <i>ric-4prom13</i> | -1075 -1538               |
| OH13190 | <i>otEx6083</i> | <i>ric-4prom14</i> | -1 -601                   |
| OH11424 | <i>otEx5177</i> | <i>ric-4prom15</i> | -634 -1095                |
| OH13191 | <i>otEx6084</i> | <i>ric-4prom16</i> | -634 -939                 |
| OH11418 | <i>otEx5176</i> | <i>ric-4prom17</i> | -948 -1095                |
| OH12073 | <i>otEx5453</i> | <i>ric-4prom18</i> | -996 -1095                |
| OH13193 | <i>otEx6086</i> | <i>ric-4prom19</i> | -948 -1063                |
| OH13192 | <i>otEx6085</i> | <i>ric-4prom20</i> | -948 -1727                |
| OH11558 | <i>otEx5247</i> | <i>ric-4prom21</i> | +73 +1083                 |
| OH12363 | <i>otEx5585</i> | <i>ric-4prom22</i> | +690 +2278                |
| OH11559 | <i>otEx5248</i> | <i>ric-4prom23</i> | +2259 +3263               |
| OH11560 | <i>otEx5249</i> | <i>ric-4prom24</i> | +3267 +4309               |
| OH11561 | <i>otEx5250</i> | <i>ric-4prom25</i> | +4310 +5317               |
| OH11562 | <i>otEx5251</i> | <i>ric-4prom26</i> | +5362 +6592               |
| OH10506 | <i>otEx4653</i> | <i>ric-4prom27</i> | +6594 +7621               |
| OH11433 | <i>otEx5182</i> | <i>snb-1prom1</i>  | -2995 -5658               |
| OH10518 | <i>otEx4665</i> | <i>snb-1prom2</i>  | -2129 -3007               |
| OH10517 | <i>otEx4664</i> | <i>snb-1prom3</i>  | -1106 -2129               |
| OH10515 | <i>otEx4662</i> | <i>snb-1prom4</i>  | -1 -1094                  |
| OH10519 | <i>otEx4666</i> | <i>snb-1prom5</i>  | -2131 -2444               |
| OH13194 | <i>otEx6087</i> | <i>snb-1prom6</i>  | -2013 -2444               |
| OH11434 | <i>otEx5183</i> | <i>snb-1prom7</i>  | -1906 -2444               |
| OH10809 | <i>otEx4853</i> | <i>snb-1prom8</i>  | -2444 -3007               |
| OH10813 | <i>otEx4857</i> | <i>snb-1prom9</i>  | -2667 -3007               |
| OH10812 | <i>otEx4856</i> | <i>snb-1prom10</i> | -2444 -2666               |
| OH12086 | <i>otEx5466</i> | <i>snb-1prom11</i> | -2557 -2666               |
| OH10488 | <i>otEx4635</i> | <i>snb-1prom12</i> | -1 -472                   |
| OH10521 | <i>otEx4668</i> | <i>snb-1prom13</i> | -473 -1094                |
| OH10522 | <i>otEx4669</i> | <i>snb-1prom14</i> | -1 -173                   |
| OH10523 | <i>otEx4670</i> | <i>snb-1prom15</i> | -174 -472                 |
| OH10525 | <i>otEx4672</i> | <i>snb-1prom16</i> | -174 -342                 |
| OH10524 | <i>otEx4671</i> | <i>snb-1prom17</i> | -343 -472                 |
| OH10811 | <i>otEx4855</i> | <i>snb-1prom18</i> | -343 -446                 |
| OH10526 | <i>otEx4673</i> | <i>snb-1prom19</i> | -362 -472                 |
| OH10810 | <i>otEx4854</i> | <i>snb-1prom20</i> | 3x (-343 -361)            |
| OH11563 | <i>otEx5252</i> | <i>snb-1prom21</i> | 29bp deletion (-343 -472) |
| OH11567 | <i>otEx5256</i> | <i>snb-1prom22</i> | -343 -472 see Fig 2C      |
| OH11568 | <i>otEx5257</i> | <i>snb-1prom23</i> | -343 -472 see Fig 2C      |
| OH11569 | <i>otEx5258</i> | <i>snb-1prom24</i> | -343 -472 see Fig 2C      |
| OH11570 | <i>otEx5259</i> | <i>snb-1prom25</i> | -343 -472 see Fig 2C      |
| OH11571 | <i>otEx5260</i> | <i>snb-1prom26</i> | -343 -472 see Fig 2C      |
| OH11572 | <i>otEx5261</i> | <i>snb-1prom27</i> | -343 -472 see Fig 2C      |
| OH12088 | <i>otEx5468</i> | <i>snb-1prom28</i> | -378 -406                 |
| OH12089 | <i>otEx5469</i> | <i>snb-1prom29</i> | 3x(-378, -406)            |
| OH11564 | <i>otEx5253</i> | <i>snb-1prom30</i> | -174 -472                 |
| OH11565 | <i>otEx5254</i> | <i>snb-1prom31</i> | -1 -1094                  |
| OH10482 | <i>otEx4629</i> | <i>unc-10prom1</i> | -4196 -5852               |
| OH10483 | <i>otEx4630</i> | <i>unc-10prom2</i> | -2743 -4200               |
| OH13195 | <i>otEx6088</i> | <i>unc-10prom3</i> | -1637 -2745               |

|         |                 |                     |                                   |
|---------|-----------------|---------------------|-----------------------------------|
| OH13196 | <i>otEx6089</i> | <i>unc-10prom4</i>  | -662 -1638                        |
| OH10480 | <i>otEx4627</i> | <i>unc-10prom5</i>  | -1 -1033                          |
| OH12299 | <i>otEx5564</i> | <i>unc-10prom6</i>  | -1287 -1638                       |
| OH10481 | <i>otEx4628</i> | <i>unc-10prom7</i>  | -1034 -1286                       |
| OH10801 | <i>otEx4845</i> | <i>unc-10prom8</i>  | -4955 -5852                       |
| OH10802 | <i>otEx4846</i> | <i>unc-10prom9</i>  | -4196 -4931                       |
| OH10803 | <i>otEx4847</i> | <i>unc-10prom10</i> | -4565 -4931                       |
| OH10804 | <i>otEx4848</i> | <i>unc-10prom11</i> | -4196 -4564                       |
| OH10484 | <i>otEx4631</i> | <i>unc-11prom1</i>  | -1 -2173                          |
| OH10485 | <i>otEx4632</i> | <i>unc-11prom2</i>  | -1068, -2173                      |
| OH10487 | <i>otEx4634</i> | <i>unc-11prom3</i>  | -1, -1067                         |
| OH10486 | <i>otEx4633</i> | <i>unc-11prom4</i>  | -1, -1057                         |
| OH10489 | <i>otEx4636</i> | <i>unc-11prom5</i>  | -377 -1067                        |
| OH10488 | <i>otEx4635</i> | <i>unc-11prom6</i>  | -1 -376                           |
| OH10491 | <i>otEx4638</i> | <i>unc-11prom7</i>  | -377 -774                         |
| OH10490 | <i>otEx4637</i> | <i>unc-11prom8</i>  | -775 -1067                        |
| OH11442 | <i>otEx5190</i> | <i>unc-11prom9</i>  | del 1 -775 -1017                  |
| OH11443 | <i>otEx5191</i> | <i>unc-11prom10</i> | del 2 deletion from -1017 to -997 |
| OH11444 | <i>otEx5192</i> | <i>unc-11prom11</i> | del 3 deletion from -996 to -947  |
| OH11445 | <i>otEx5193</i> | <i>unc-11prom12</i> | del 4 deletion from -946 to -897  |
| OH11446 | <i>otEx5194</i> | <i>unc-11prom13</i> | del 5 deletion from -896 to -847  |
| OH11447 | <i>otEx5195</i> | <i>unc-11prom14</i> | del 6 deletion from -846 to -797  |
| OH11448 | <i>otEx5196</i> | <i>unc-11prom15</i> | del 7 -1067 -775                  |
| OH10534 | <i>otEx4680</i> | <i>unc-11prom16</i> | +1512 +2600                       |
| OH10507 | <i>otEx4654</i> | <i>snn-1prom1</i>   | -1 -1102                          |
| OH13197 | <i>otEx6090</i> | <i>snn-1prom2</i>   | -1 -413                           |
| OH13198 | <i>otEx6091</i> | <i>snn-1prom3</i>   | -1 -231                           |
| OH10508 | <i>otEx4655</i> | <i>snn-1prom4</i>   | +5582 +6603                       |
| OH13199 | <i>otEx6092</i> | <i>unc-104prom1</i> | -4206 -2809                       |
| OH13200 | <i>otEx6093</i> | <i>unc-104prom2</i> | -2807 -1902                       |
| OH10808 | <i>otEx4852</i> | <i>unc-104prom3</i> | -1984 -884                        |
| OH10503 | <i>otEx4650</i> | <i>unc-104prom4</i> | -1084 -1                          |
| OH12360 | <i>otEx5582</i> | <i>unc-104prom5</i> | +1260 +2860                       |
| OH12362 | <i>otEx5584</i> | <i>unc-104prom6</i> | +4627 -5766                       |
| OH10498 | <i>otEx4645</i> | <i>unc-31prom1</i>  | -3248 -2222                       |
| OH10497 | <i>otEx4644</i> | <i>unc-31prom2</i>  | -2221 -1133                       |
| OH10495 | <i>otEx4642</i> | <i>unc-31prom3</i>  | -1132 -130                        |
| OH10805 | <i>otEx4849</i> | <i>unc-31prom4</i>  | -2221 -1812                       |
| OH10496 | <i>otEx4643</i> | <i>unc-31prom5</i>  | -3248 -130                        |
| OH12364 | <i>otEx5586</i> | <i>unc-31prom6</i>  | +5570 +7080                       |
| OH13201 | <i>otEx6094</i> | <i>egl-3prom1</i>   | -1 -1046                          |
| OH13202 | <i>otEx6095</i> | <i>egl-21prom1</i>  | -1 -1022                          |
| OH13203 | <i>otEx6096</i> | <i>maco-1prom1</i>  | -1014 -2034                       |
| OH10817 | <i>otEx4858</i> | <i>maco-1prom2</i>  | -1 -1015                          |
| OH12301 | <i>otEx5566</i> | <i>maco-1prom3</i>  | -424 -1015                        |
| OH12302 | <i>otEx5567</i> | <i>maco-1prom4</i>  | -1 -423                           |
| OH10509 | <i>otEx4656</i> | <i>shn-1prom1</i>   | -1 -1037                          |
| OH10510 | <i>otEx4657</i> | <i>tbb-1prom1</i>   | -1 -1098                          |
| OH13204 | <i>otEx6097</i> | <i>tbb-1prom2</i>   | -1 -447                           |
| OH13205 | <i>otEx6098</i> | <i>tbb-2prom1</i>   | -1179 -2513                       |
| OH10511 | <i>otEx4658</i> | <i>tbb-2prom2</i>   | -1 -1110                          |

|         |                 |                             |                    |
|---------|-----------------|-----------------------------|--------------------|
| OH13206 | <i>otEx6099</i> | <i>tbb-4prom1</i>           | -1 -1165           |
| OH10512 | <i>otEx4659</i> | <i>tbb-5prom1</i>           | -1 -1042           |
| OH10513 | <i>otEx4660</i> | <i>tbb-6prom1</i>           | -1060 -1           |
| OH13603 | <i>otEx6315</i> | <i>unc-108prom1</i>         | -973 -2006         |
| OH12908 | <i>otEx5944</i> | <i>unc-108prom2</i>         | -2 -964            |
| OH13225 | <i>otEx6118</i> | <i>unc-18prom1</i>          | -1 -1119           |
| OH13224 | <i>otEx6117</i> | <i>unc-57prom1</i>          | -1 -1096           |
| OH13226 | <i>otEx6119</i> | <i>syd-2prom1</i>           | -1 -1016           |
| OH13227 | <i>otEx6120</i> | <i>syd-2prom2</i>           | -1 -537            |
| OH13259 | <i>otEx6145</i> | <i>rab-3prom2</i>           | +2 -917            |
| OH12919 | <i>otEx5955</i> | <i>rab-3prom3</i>           | +1585 +42          |
| OH12916 | <i>otEx5952</i> | <i>rab-3prom4</i>           | +2921 +1566        |
| OH13262 | <i>otEx6148</i> | <i>rab-3prom5</i>           | +2921 +2188        |
| OH13265 | <i>otEx6151</i> | <i>rab-3prom6</i>           | +2380 +2167        |
| OH13268 | <i>otEx6154</i> | <i>rab-3prom7</i>           | +2921 +2559        |
| OH13271 | <i>otEx6157</i> | <i>ehs-1prom2</i>           | -837 -1            |
| OH13274 | <i>otEx6160</i> | <i>ehs-1prom4</i>           | -271 -332          |
| OH13277 | <i>otEx6163</i> | <i>ric-19prom1</i>          | -1 -608            |
| OH13283 | <i>otEx6169</i> | <i>ric-19prom2</i>          | -315 -608          |
| OH13280 | <i>otEx6166</i> | <i>ric-19prom3</i>          | -1 -336            |
| OH13284 | <i>otEx6170</i> | <i>ric-19prom5</i>          | -231 -378          |
| OH13287 | <i>otEx6173</i> | <i>ric-19prom6</i>          | -1 -147            |
| OH13331 | <i>otEx6216</i> | <i>ric-19prom7</i>          | +264 +794          |
| OH13332 | <i>otEx6217</i> | <i>ric-19prom8</i>          | +1422 +2159        |
| OH13294 | <i>otEx6180</i> | <i>ric-19prom6del1</i>      | -147 to -143 AAAAA |
| OH13295 | <i>otEx6181</i> | <i>ric-19prom6del2</i>      | -142 to -138 AAAAA |
| OH13296 | <i>otEx6182</i> | <i>ric-19prom6del3</i>      | -137 to -133 AAAAA |
| OH13297 | <i>otEx6183</i> | <i>ric-19prom6del4</i>      | -132 to -128 AAAAA |
| OH13298 | <i>otEx6184</i> | <i>ric-19prom6del5</i>      | -127 to -123 AAAAA |
| OH13299 | <i>otEx6185</i> | <i>ric-19prom6del6</i>      | -122 to -118 AAAAA |
| OH13300 | <i>otEx6186</i> | <i>ric-19prom6del7</i>      | -117 to -113 AAAAA |
| OH13301 | <i>otEx6187</i> | <i>ric-19prom6del8</i>      | -112 to -108 AAAAA |
| OH13302 | <i>otEx6188</i> | <i>ric-19prom6del9</i>      | -107 to -103 AAAAA |
| OH13303 | <i>otEx6189</i> | <i>ric-19prom6del10</i>     | -102 to -98 AAAAA  |
| OH13304 | <i>otEx6190</i> | <i>ric-19prom6del11</i>     | -97 to -93 AAAAA   |
| OH13305 | <i>otEx6191</i> | <i>ric-19prom6del12</i>     | -92 to -88 AAAAA   |
| OH13306 | <i>otEx6192</i> | <i>ric-19prom6del13</i>     | -87 to -83 AAAAA   |
| OH13307 | <i>otEx6193</i> | <i>ric-19prom6del14</i>     | -82 to -78 AAAAA   |
| OH13308 | <i>otEx6194</i> | <i>ric-19prom6del15</i>     | -77 to -73 AAAAA   |
| OH13309 | <i>otEx6195</i> | <i>ric-19prom6del16</i>     | -72 to -68 AAAAA   |
| OH13310 | <i>otEx6196</i> | <i>ric-19prom6del17</i>     | -67 to -63 AAAAA   |
| OH13311 | <i>otEx6197</i> | <i>ric-19prom6del18</i>     | -62 to -58 AAAAA   |
| OH13312 | <i>otEx6198</i> | <i>ric-19prom6del19</i>     | -57 to -53 AAAAA   |
| OH13313 | <i>otEx6199</i> | <i>ric-19prom6del20</i>     | -52 to -48 AAAAA   |
| OH13314 | <i>otEx6200</i> | <i>ric-19prom6del21</i>     | -47 to -43 AAAAA   |
| OH13315 | <i>otEx6201</i> | <i>ric-19prom6del22</i>     | -42 to -38 AAAAA   |
| OH13316 | <i>otEx6202</i> | <i>ric-19prom6del23</i>     | -37 to -33 AAAAA   |
| OH13317 | <i>otEx6203</i> | <i>ric-19prom6del24</i>     | -32 to -28 AAAAA   |
| OH13318 | <i>otEx6204</i> | <i>ric-19prom6del25</i>     | -27 to -23 AAAAA   |
| OH13319 | <i>otEx6205</i> | <i>ric-19prom6del26</i>     | -22 to -18 AAAAA   |
| OH13320 | <i>otEx6206</i> | <i>ric-19prom6del27</i>     | -17 to -13 AAAAA   |
| OH13321 | <i>otEx6207</i> | <i>ric-19prom6del28</i>     | -12 to -8 AAAAA    |
| OH13322 | <i>otEx6208</i> | <i>ric-19prom6del29</i>     | -7 to -3 AAAAA     |
| OH13325 | <i>otEx6211</i> | <i>ric-19prom6del6+del7</i> |                    |
| OH12909 | <i>otEx5945</i> | <i>snt-1prom1</i>           | -3720 -2687        |
| OH12901 | <i>otEx5937</i> | <i>snt-1prom2</i>           | -2710 -1834        |



|                                                                |                       |                                                                      |             |
|----------------------------------------------------------------|-----------------------|----------------------------------------------------------------------|-------------|
| OH12896                                                        | <i>otEx5932</i>       | <i>snt-1prom3</i>                                                    | -772 -100   |
| OH12911                                                        | <i>otEx5947</i>       | <i>snt-1prom4</i>                                                    | +111 +904   |
| OH12922                                                        | <i>otEx5958</i>       | <i>snt-1prom5</i>                                                    | +1019 +2113 |
| OH13247                                                        | <i>otEx6133</i>       | <i>rgef-1prom1</i>                                                   | -1 -1264    |
| OH13250                                                        | <i>otEx6136</i>       | <i>rgef-1prom2</i>                                                   | -1 -583     |
| OH13253                                                        | <i>otEx6139</i>       | <i>rgef-1prom3</i>                                                   | -230 -466   |
| OH13256                                                        | <i>otEx6142</i>       | <i>sng-1prom1</i>                                                    | -1 -1076    |
| OH12939                                                        | <i>otEx5974</i>       | <i>sng-1prom2</i>                                                    | -1 -548     |
|                                                                |                       |                                                                      |             |
| <b>PROMOTER CONSTRUCTS CARRYING MUTAGENIZED BINDING MOTIFS</b> |                       |                                                                      |             |
| <b>Strain name</b>                                             | <b>Transgene name</b> | <b>Construct</b>                                                     |             |
| OH12082                                                        | <i>otEx5462</i>       | <i>ric-4 prom4 COEmut</i>                                            |             |
| OH12083                                                        | <i>otEx5463</i>       | <i>ric-4prom4 UNC30mut</i>                                           |             |
| OH11429                                                        | <i>otEx5180</i>       | <i>ric-4prom4 COE+UNC30mut</i>                                       |             |
| OH13208                                                        | <i>otEx6101</i>       | <i>ric-4prom26 ASE1mut</i>                                           |             |
| OH13209                                                        | <i>otEx6102</i>       | <i>ric-4prom26 ASE2mut</i>                                           |             |
| OH13210                                                        | <i>otEx6103</i>       | <i>ric-4prom26 ASE1+2mut</i>                                         |             |
| OH13212                                                        | <i>otEx6105</i>       | <i>ric-4prom17 HOXmutA</i>                                           |             |
| OH13214                                                        | <i>otEx6107</i>       | <i>ric-4prom17 HOXmutB</i>                                           |             |
| OH13215                                                        | <i>otEx6108</i>       | <i>ric-4prom17 HOXmutC</i>                                           |             |
| OH11441                                                        | <i>otEx5189</i>       | <i>snb-1prom7 COEmut</i>                                             |             |
| OH13211                                                        | <i>otEx6104</i>       | <i>snb-1prom11 UNC30mut</i>                                          |             |
| OH13216                                                        | <i>otEx6109</i>       | <i>snb-1prom17 HOX1mut</i>                                           |             |
| OH13217                                                        | <i>otEx6110</i>       | <i>snb-1prom17 HOX2mut</i>                                           |             |
| OH13218                                                        | <i>otEx6111</i>       | <i>snb-1prom17 HOX3mut</i>                                           |             |
| OH13219                                                        | <i>otEx6112</i>       | <i>snb-1prom17 HOX1+2mut</i>                                         |             |
| OH13220                                                        | <i>otEx6113</i>       | <i>snb-1prom17 HOX1+2+3mut</i>                                       |             |
|                                                                |                       |                                                                      |             |
| <b>FOSMID REPORTERS</b>                                        |                       |                                                                      |             |
| <b>Strain name</b>                                             | <b>Transgene name</b> | <b>Construct</b>                                                     |             |
| OH10251                                                        | <i>otEx4556</i>       | <i>ric-4fosmid A</i>                                                 |             |
| OH11575                                                        | <i>otEx5264</i>       | <i>ric-4fosmid B</i>                                                 |             |
| OH11576                                                        | <i>otEx5265</i>       | <i>ric-4fosmid C</i>                                                 |             |
| OH10246                                                        | <i>otEx4551</i>       | <i>unc-10fosmid isoform a</i>                                        |             |
| OH10245                                                        | <i>otEx4550</i>       | <i>unc-10fosmid isoform b</i>                                        |             |
| OH10247                                                        | <i>otEx4552</i>       | <i>unc-11fosmid</i>                                                  |             |
| OH11411                                                        | <i>otEx5174</i>       | <i>unc-31fosmid</i>                                                  |             |
| OH10249                                                        | <i>otEx4553</i>       | <i>unc-64fosmid isoform a</i>                                        |             |
| OH10248                                                        | <i>otEx4553</i>       | <i>unc-64fosmid isoform b</i>                                        |             |
| OH10250                                                        | <i>otEx4555</i>       | <i>unc-104fosmid</i>                                                 |             |
| OH10253                                                        | <i>otEx4558</i>       | <i>snb-1fosmid</i>                                                   |             |
| OH10535                                                        | <i>otEx4681</i>       | <i>snn-1fosmid</i>                                                   |             |
| OH10243                                                        | <i>otEx4548</i>       | <i>tbb-1fosmid</i>                                                   |             |
| OH10244                                                        | <i>otEx4549</i>       | <i>tbb-5fosmid</i>                                                   |             |
| OH11410                                                        | <i>otEx5173</i>       | <i>nsf-1fosmid</i>                                                   |             |
| OH11412                                                        | <i>otEx5175</i>       | <i>maco-1fosmid</i>                                                  |             |
| OH10252                                                        | <i>otEx4557</i>       | <i>shn-1fosmid (co-injected with linearized pRF4 (rol-6) marker)</i> |             |
| OH12883                                                        | <i>otEx5920</i>       | <i>rab-3fosmid</i>                                                   |             |
| OH13237                                                        | <i>otEx6123</i>       | <i>sng-1fosmid</i>                                                   |             |
| OH12888                                                        | <i>otEx5924</i>       | <i>snt-1fosmid</i>                                                   |             |
| OH13239                                                        | <i>otEx6125</i>       | <i>ehs-1fosmid isoform a</i>                                         |             |
| OH13238                                                        | <i>otEx6124</i>       | <i>ehs-1fosmid isoform b</i>                                         |             |
| OH12849                                                        | <i>otEx5886</i>       | <i>unc-57fosmid</i>                                                  |             |
| OH12889                                                        | <i>otEx5925</i>       | <i>unc-18fosmid isoform a</i>                                        |             |
| OH12884                                                        | <i>otEx5921</i>       | <i>syd-2fosmid</i>                                                   |             |

|                                                        |                       |                                   |                                                  |
|--------------------------------------------------------|-----------------------|-----------------------------------|--------------------------------------------------|
| OH12857                                                | <i>otEx5894</i>       | <i>egl-3fosmid</i>                |                                                  |
| OH12860                                                | <i>otEx5897</i>       | <i>egl-21fosmid</i>               |                                                  |
| OH13290                                                | <i>otEx6176</i>       | <i>ric-19fosmid</i>               |                                                  |
| OH13207                                                | <i>otEx6100</i>       | <i>unc-108fosmid</i>              |                                                  |
| OH12867                                                | <i>otEx5904</i>       | <i>rgef-1fosmid</i>               |                                                  |
| OH12863                                                | <i>otEx5900</i>       | <i>tbb-4fosmid</i>                |                                                  |
|                                                        |                       |                                   |                                                  |
| <b>FOSMID REPORTERS CARRYING MUTAGENIZED SEQUENCES</b> |                       |                                   |                                                  |
| <b>Strain name</b>                                     | <b>Transgene name</b> | <b>Construct</b>                  |                                                  |
| OH13172                                                | <i>otEx6066</i>       | <i>cho-1fosmid COEmut</i>         |                                                  |
| OH13221                                                | <i>otEx6114</i>       | <i>cho-1fosmid COEmut control</i> |                                                  |
| OH13222                                                | <i>otEx6115</i>       | <i>cho-1fosmid TTX3mut</i>        |                                                  |
| OH13241                                                | <i>otEx6127</i>       | <i>eat-4fosmid UNC86mut</i>       |                                                  |
| OH12872                                                | <i>otEx5909</i>       | <i>gcy-5fosmid ASEmut</i>         |                                                  |
| OH13223                                                | <i>otEx6116</i>       | <i>ric-4fosmid del1+2</i>         |                                                  |
|                                                        |                       |                                   |                                                  |
| <b>INTEGRATED TRANSGENES</b>                           |                       |                                   |                                                  |
| <b>Strain name</b>                                     | <b>Transgene name</b> | <b>Construct</b>                  | <b>Co-injection marker (chromosome if known)</b> |
| OH10684                                                | <i>otIs350</i>        | <i>ric-4fosmid A – pBALU23</i>    | <i>pha-1</i>                                     |
| OH10686                                                | <i>otIs352</i>        | <i>ric-4fosmid A – pBALU23</i>    | <i>pha-1</i>                                     |
| OH10687                                                | <i>otIs353</i>        | <i>ric-4fosmid A – pBALU23</i>    | <i>pha-1</i>                                     |
| OH10688                                                | <i>otIs354</i>        | <i>ric-4fosmid A – pBALU23</i>    | <i>pha-1</i>                                     |
| OH12541                                                | <i>otIs532</i>        | <i>cho-1fosmid – pBALU23</i>      | –                                                |
| OH12542                                                | <i>otIs533</i>        | <i>cho-1fosmid – pBALU23</i>      | –                                                |
| OH12543                                                | <i>otIs534</i>        | <i>cho-1fosmid – pBALU23</i>      | –                                                |
| OH12544                                                | <i>otIs535</i>        | <i>cho-1fosmid – pBALU23</i>      | – (X)                                            |
| OH12545                                                | <i>otIs536</i>        | <i>cho-1fosmid – pBALU23</i>      | – (X)                                            |
| OH12546                                                | <i>otIs537</i>        | <i>cho-1fosmid – pBALU23</i>      | –                                                |
| OH12547                                                | <i>otIs538</i>        | <i>cho-1fosmid – pBALU23</i>      | –                                                |
| OH11344                                                | <i>otIs414</i>        | <i>ric-4prom17 – NLS::GFP</i>     | <i>pha-1, elt-2::DsRed2</i>                      |
| OH11417                                                | <i>otIs420</i>        | <i>ric-4prom17 – NLS::GFP</i>     | <i>pha-1, elt-2::DsRed2</i>                      |
| OH11419                                                | <i>otIs421</i>        | <i>ric-4prom17 – NLS::GFP</i>     | <i>pha-1, elt-2::DsRed2</i>                      |
| OH11420                                                | <i>otIs422</i>        | <i>ric-4prom17 – NLS::GFP</i>     | <i>pha-1, ttx-3::mCherry</i>                     |
| OH11421                                                | <i>otIs423</i>        | <i>ric-4prom17 – NLS::GFP</i>     | <i>pha-1, ttx-3::mCherry (X)</i>                 |
| OH11422                                                | <i>otIs424</i>        | <i>ric-4prom17 – NLS::GFP</i>     | <i>pha-1, ttx-3::mCherry</i>                     |
| OH11416                                                | <i>otIs419</i>        | <i>snb-1prom17 – NLS::GFP</i>     | <i>pha-1, elt-2::DsRed2</i>                      |
| OH12313                                                | <i>otIs489</i>        | <i>ric-4prom4 – NLS::GFP</i>      | <i>elt-2::DsRed2 (X)</i>                         |
| OH12314                                                | <i>otIs490</i>        | <i>ric-4prom4 – NLS::GFP</i>      | <i>elt-2::DsRed2 (IV)</i>                        |
| OH9545                                                 | <i>otIs287</i>        | <i>rab-3prom1 – NLS::YFP</i>      | <i>rol-6 (IV)</i>                                |
| OH9609                                                 | <i>otIs291</i>        | <i>rab-3prom1 – NLS::YFP</i>      | <i>rol-6 (V)</i>                                 |
| OH10689                                                | <i>otIs355</i>        | <i>rab-3prom1 – NLS::TagRFP</i>   | – (IV)                                           |
| OH10690                                                | <i>otIs356</i>        | <i>rab-3prom1 – NLS::TagRFP</i>   | – (V)                                            |
| OH11061                                                | <i>otIs380</i>        | <i>ric-19prom6 – NLS::GFP</i>     | <i>elt-2::DsRed2</i>                             |
| OH11062                                                | <i>otIs381</i>        | <i>ric-19prom6 – NLS::GFP</i>     | <i>elt-2::DsRed2 (V)</i>                         |
| OH12410                                                | <i>otIs501</i>        | <i>ehs-1prom4 – NLS::GFP</i>      | <i>rps-5::Dsred2</i>                             |

## Generation of fosmid reporters

All fosmid reporter constructs were generated using  $\lambda$ -Red-mediated recombineering in bacteria as previously described (Tursun et al., 2009).

To generate a *snn-1* fosmid reporter, a fosmid extension protocol was used (as previously described (Tursun et al., 2009)). Fosmid WRM0629aH04 containing pan-neuronal gene *snn-1* was extended by 3306 bp to include the first exon of *snn-1* and 2748 bp of genomic sequence just upstream of the ATG of *snn-1* (covering the entire upstream intergenic region, shown as a red line in **Fig.S1**).

Deletions of the terminal selector binding sites for the *cho-1*, *gcy-5* and *eat-4* fosmids were done by replacement of the binding site by FRT or FRT\* depending on which pBALU was used for reporter tagging. For the mutagenesis of COE motif in the *cho-1* fosmid a FRT scar was placed 23 base pairs upstream of the mutated COE motif. A control *cho-1* fosmid containing the FRT in the same place but the wild type COE motif was also made. Deletions 1 and 2 in the *ric-4* fosmid reporter (**Fig.5T**) were done by replacement of the corresponding fosmid sequence by Lox2272 and FRT respectively. Deletions of prom28, prom17 and prom1+prom9 in the *snb-1* fosmid reporter (**Fig.2C and Fig.S7K**) were done by replacement of the corresponding fosmid sequence by FRT, Lox2272 and FRT respectively. The fosmid clones, primer sequences for tagging and mutagenesis and the sequences of the recombineering cassettes made and used in this study are provided in the Supplementary Methods. All fosmid constructs were linearized using SdaI or NotI and injected as complex extrachromosomal arrays in a *pha-1* (*e2123*) mutant background strain (Granato et al., 1994) in the following concentrations: linearized fosmid construct 15 ng/ $\mu$ L, linearized *pha-1* rescuing plasmid pBX 2.5 ng/ $\mu$ L, sonicated OP50 bacterial genomic DNA 100 ng/ $\mu$ L (apart from *shn-1* fosmid that was injected in N2 background using as co-injection marker linearized pRF4 (*rol-6*) at 2.5ng/ $\mu$ L instead of *pha-1* rescuing plasmid pBX). Integrated fosmid reporters *ric-4*<sup>Fosmid</sup>::SL2::NLS-YFP-H2B transgenes (*otIs350*, *otIs352*, *otIs353*, *otIs354*), and integrated *cho-1*<sup>Fosmid</sup>::SL2::NLS-YFP-H2B transgenes (*otIs532* - *otIs538*), were generated by gamma irradiation and outcrossed four to six times.

Fosmid reporters were generated using the recombineering cassettes pBALU23 and pBALUNI that we created for the purposes of this study. The following table contains information of the fosmid clones and primers used to create each fosmid reporter. Sequences

of the recombineering cassettes are provided below. pBALU23 was used for all fosmid reporters except for fosmid reporters *ric-4 B* and *ric-4 C* marked with (\*), where pBALUNI was used instead to tag the different *ric-4* isoforms at the 5' end of the transcript.

| GENE                                    | FOSMID      | PRIMERS FOR RECOMBINEERING                                                                  |                                                                                                 |
|-----------------------------------------|-------------|---------------------------------------------------------------------------------------------|-------------------------------------------------------------------------------------------------|
|                                         |             | SL2                                                                                         | H2B (*NLS)                                                                                      |
| <i>nsf-1</i>                            | WRM062aD09  | 5'CCGACACTTCTTAATATGATGGAAGGTCTTGCTCTAAACTTGTA<br>CCGTTAA <b>GCTGTCTCATCCTACTTTTAC</b> 3'   | 5'GAATAAATTTCTTAGCTTTTAGAGTTCTATGTTCAACTGAAGAG<br>CTACTT <b>CTACTTGCTGGAAGTGTACTTGG</b> 3'      |
| <i>rab-3</i>                            | WRM0636dH02 | 5'CTCGAAGCGAATCCGACCCAAAAGCCTGCTCAACAGCAATGC<br>AATTGCTAA <b>GCTGTCTCATCCTACTTTTAC</b> 3'   | 5'GAATTTGGGAAAATTTTGGAGTTTTATAGATAGTATAATAGAAC<br>GTAGAATTT <b>CTACTTGCTGGAAGTGTACTTGG</b> 3'   |
| <i>ric-4</i><br>(reporter<br>A Fig 2B)  | WRM0640cB04 | 5'GTCCGTGTGGAATCTGCTAACAAGCGTGCGAAGAATCTCATCA<br>CAAATAA <b>GCTGTCTCATCCTACTTTTAC</b> 3'    | 5'GGAAAATGGAATGGTAAGATGAGACACAGAGATTTTAAAAAC<br>ATTAAAATA <b>CTACTTGCTGGAAGTGTACTTGG</b> 3'     |
| <i>ric-4</i><br>(reporter<br>B Fig 2B)* | WRM0640cB04 | 5'CATAAAATTTATTTTTCAGGTTCTGTGAACGGTCAGACAACAAG<br>CAATA <b>ATGACCGCTCCAAAGAAGAAACGCA</b> 3' | 5'TTGAGGTTGATAGCCTCAAGACCCTCTGGAATATCATCATCTC<br>CTGACAT <b>TGAATTAATAATTAGAAGTTGAAAATAC</b> 3' |
| <i>ric-4</i><br>(reporter<br>C Fig 2B)* | WRM0640cB04 | 5'ATCGTTTCCCGTGTAGCCGGGCGGTTTTGAAAGTTTAAAA<br>AACGGGG <b>ATGACCGCTCCAAAGAAGAAACGCA</b> 3'   | 3'TACGGACGGGATGCCGTTGGCCGCCGGAGCGCCGCGCCG<br>AGCCGACAT <b>TGAATTAATAATTAGAAGTTGAAAATAC</b> 3'   |
| <i>snb-1</i>                            | WRM065cH10  | 5'ATCGTCGTCATTCTTATTATCATCATCGTTTTATGGGCTGGAGG<br>AAAATAA <b>GCTGTCTCATCCTACTTTTAC</b> 3'   | 5'GAAATTACAGCGTTTCGGGGGATTTTTTTATCCGGGACAAAGG<br>TCGTGTAC <b>CTACTTGCTGGAAGTGTACTTGG</b> 3'     |
| <i>unc-64</i><br>(a)                    | WRM0634cD04 | 5'CTAATCGGCTTCGTTTCTCTGTGGCTATTAGTATATTCCTGG<br>CATTAA <b>GCTGTCTCATCCTACTTTTAC</b> 3'      | 5'GAAATTTTGAATTTTTTTAGCGTGGGCGTTTAGACGGGGAAA<br>CAAATGGGC <b>CTACTTGCTGGAAGTGTACTTGG</b> 3'     |
| <i>unc-64</i><br>(b)                    | WRM0634cD04 | 5'CTCATCACTGGCCTAATTATTTTATTTTGTGTTTATGCGAAAGTA<br>TTATAA <b>GCTGTCTCATCCTACTTTTAC</b> 3'   | 5'CAATTTTTTTCATTTTGGTTAAGTTTTTCTTTTCGTGAGATTTGA<br>AAAAAT <b>CTACTTGCTGGAAGTGTACTTGG</b> 3'     |
| <i>sng-1</i>                            | WRM0611aF10 | 5'CAACAACCACCATCAACCATACACTCAGTCGGAAGGATATG<br>GTTATTAG <b>GCTGTCTCATCCTACTTTTAC</b> 3'     | 5'TACAAGTGCTCAGGTCCATTTGTATGTGTTTTTTTTTTGTTTGGC<br>TAAAAA <b>CTACTTGCTGGAAGTGTACTTGG</b> 3'     |
| <i>snt-1</i>                            | WRM0630cA09 | 5'ACACTTGGACCAGTTGAAGAAGAAGGTGATAAGAAAGATGATA<br>AGAAATAA <b>GCTGTCTCATCCTACTTTTAC</b> 3'   | 5'TTTAGATTGAATAAGGCATTTAAATTTAAAAAAAATGATAAAGTC                                                 |

|                        |                                         |                                                                                                                                                                                                                |
|------------------------|-----------------------------------------|----------------------------------------------------------------------------------------------------------------------------------------------------------------------------------------------------------------|
|                        |                                         | ATACATCTACTTGCTGGAAGTGTACTTGG <sup>3</sup> '                                                                                                                                                                   |
| <i>unc-10</i><br>(a)   | WRM0630dC05                             | 5'GTCCAGTTCGAAAAGATTCCGATGTATCAGTTGGAGGTGCTCA<br>GCAGTAA <b>GCTGTCTCATCCTACTTTAC</b> <sup>3</sup> '<br><br>5'ATGACCTGTGGTAATTAAGACAAAAACAACAAAAACATATGA<br>AATTTGCTACTTGCTGGAAGTGTACTTGG <sup>3</sup> '        |
| <i>unc-10</i><br>(b)   | WRM0630dC05                             | 5'CTTCGTGTTTTGAGTGACGTAATTTTCAGTTGGCTTCCAGTGC<br>TCGCTGA <b>GCTGTCTCATCCTACTTTAC</b> <sup>3</sup> '<br><br>5'CGACAACCTGACCCGGACCAAGATTGTGCACAAATGTACCAAG<br>AGGACCACTACTTGCTGGAAGTGTACTTGG <sup>3</sup> '      |
| <i>unc-18</i><br>(a/c) | WRM0615cG10                             | 5'GATAAGTTCCTGACCAACTTGCGTGACCTGAACAAACCGCGTG<br>ACATATGA <b>GCTGTCTCATCCTACTTTAC</b> <sup>3</sup> '<br><br>5'GTATCTTGTTGTTTCGTCAATTGTCGATTCTTTTCGGTACCCCG<br>CACTCTGCTACTTGCTGGAAGTGTACTTGG <sup>3</sup> '    |
| <i>ehs-1</i><br>(a)    | WRM0621aG07                             | 5'CAACCGGCTGGATTTCGCTGATTTTTCGGACTTTGGATCGGCTT<br>TCAATTGA <b>GCTGTCTCATCCTACTTTAC</b> <sup>3</sup> '<br><br>5'CAATTTGACTGGCGTTGGGGCTTATAGTGGGTAAGGTATAATT<br>ATTAATACTACTTGCTGGAAGTGTACTTGG <sup>3</sup> '    |
| <i>ehs-1</i><br>(b)    | WRM0621aG07                             | 5'GCTCCTCCAAAATCTGCTCGCGAAACACCTGTCAATGATCCTT<br>TTGCGTAA <b>GCTGTCTCATCCTACTTTAC</b> <sup>3</sup> '<br><br>5'GTGATGGGCTGAAATTATTTAGACTTTAAATAAATTGATACTCA<br>CTAAGACTACTTGCTGGAAGTGTACTTGG <sup>3</sup> '     |
| <i>unc-11</i>          | WRM0623aD03                             | 5'CACAAGCTCAACAGGCCAGGCCGCTCAGCCGATCCATTTG<br>GATTATAG <b>GCTGTCTCATCCTACTTTAC</b> <sup>3</sup> '<br><br>5'ATAAATCAGGGAATGTTACGAGAGAGATAGAGAGAAATAGACG<br>ACTAGA <b>CTACTTGCTGGAAGTGTACTTGG</b> <sup>3</sup> ' |
| <i>unc-57</i>          | WRM0635aD01                             | 5'ACTGGATTATCCCTGTTACCTATGTACAGGTTCTAGTGCCTCT<br>TAAATAA <b>GCTGTCTCATCCTACTTTAC</b> <sup>3</sup> '<br><br>5'CAAAAAATGGAAAGAATTGACTGGGTTTTGGAGGGAGAAATAC<br>ATTTTTTCTACTTGCTGGAAGTGTACTTGG <sup>3</sup> '      |
| <i>snn-1</i>           | WRM0629aH04<br>(extended by 3306<br>bp) | 5'GACACGATGGGACAGTTGAAGCGCACTTTTGCCGGATTTTTG<br>GAGAATAA <b>GCTGTCTCATCCTACTTTAC</b> <sup>3</sup> '<br><br>5'GAAATTGATGCGAGTTTCAGTATTATGCAGATTGGAGCAGGCGG<br>CACGAGTCTACTTGCTGGAAGTGTACTTGG <sup>3</sup> '     |
| <i>unc-104</i>         | WRM062bA11                              | 5'GGAACAACATTGAAATCTCCAACATCATCTTCAATTGCTGC<br>TTCATAA <b>GCTGTCTCATCCTACTTTAC</b> <sup>3</sup> '<br><br>5'GTGAATAATCACAGAAAGAAAAACAGATAGGAAAGCAAAGAAA<br>ATTAGATACTCTACTTGCTGGAAGTGTACTTGG <sup>3</sup> '     |
| <i>syd-2</i>           | WRM0636aB01                             | 5'CGTAAGAATGATTCCATAGCAAATCCTACGAGTTTCATTTATA<br>TACCTAG <b>GCTGTCTCATCCTACTTTAC</b> <sup>3</sup> '<br><br>5'AGACACGAACGAGTGAGAGGGAGCGGAAAAATTTAATTTAA<br>CTAACTAACTACTTGCTGGAAGTGTACTTGG <sup>3</sup> '       |
| <i>egl-3</i>           | WRM0636dD08                             | 5'ACCAACAAGAAGCTCGACACCGTTCAAAAAGCCCACAAACGCA<br>GCCACTAA <b>GCTGTCTCATCCTACTTTAC</b> <sup>3</sup> '<br><br>5'AATTCTTAGAAATTTTTGAAGGAAGGAAGAAATTGGGGAATTT<br>TGTACATCTACTTGCTGGAAGTGTACTTGG <sup>3</sup> '     |
| <i>egl-21</i>          | WRM0640dE02                             | 5'GAGCAAGAGCAAATCGCCGAGCTCGTCAACGAGATTGCCCGT<br>CGTCGTTAA <b>GCTGTCTCATCCTACTTTAC</b> <sup>3</sup> '                                                                                                           |

|                |             |                                                                                                                                                                                              |
|----------------|-------------|----------------------------------------------------------------------------------------------------------------------------------------------------------------------------------------------|
|                |             | 5'ATGCAATGTGAATTGGTGTGTGGGAGTGATGACGGCGAATGA<br>CTCGTGGGC <b>CTACTTGCTGGAAGTGTACTTGG</b> 3'                                                                                                  |
| <i>ric-19</i>  | WRM0639aB01 | 5'CAATCTCTTATCGATGGATTGACAGAGAGAATGAGGATAACT<br>TGTTGTGA <b>GCTGTCTCATCCTACTTTAC</b> 3'<br><br>5'AGAAAAATATAGTTTAAAAACATTTATTTTTTCGATTTTACACATA<br>GAACATC <b>CTACTTGCTGGAAGTGTACTTGG</b> 3' |
| <i>unc-31</i>  | WRM0630aF09 | 5'CAAGTATGGTCGAAGGAGCCGGTGCAAAGATGTTCTCGCTTTT<br>TAAATAG <b>GCTGTCTCATCCTACTTTAC</b> 3'<br><br>5'CAAATAAATCCCGTGAGAAAACACCGCTTAAAGAAAAATATTAG<br>AAAAAT <b>CTACTTGCTGGAAGTGTACTTGG</b> 3'    |
| <i>unc-108</i> | WRM0624cF12 | 5'CCAGGTGGAAATGCGACGGGAGGATTGGCGGTGGATCTGG<br>ATGCTGTAA <b>GCTGTCTCATCCTACTTTAC</b> 3'<br><br>5'AACGATTTAGTTAAACATTCAAAGCTCATTCAAAGAAACATCA<br>TCAAAA <b>CTACTTGCTGGAAGTGTACTTGG</b> 3'      |
| <i>shn-1</i>   | WRM0625dB07 | 5'GAATTGCTCATCGCCAGATAATTGAATCAGCTCTCCGTGGCCT<br>CCTCCAGTGA <b>GCTGTCTCATCCTACTTTAC</b> 3'<br><br>5'GCTACGCGGAGAAAATCGAGAAAGTAGAAATGAGGGGGGAAA<br>ATCATAAA <b>CTACTTGCTGGAAGTGTACTTGG</b> 3' |
| <i>maco-1</i>  | WRM0640bE08 | 5'GAACAAGGGAAAATTTGGAGCTCCATCTCAACCAGCCGCTCGT<br>CTTGCTTGA <b>GCTGTCTCATCCTACTTTAC</b> 3'<br><br>5'TAAGAGAAAGAGTTTTTAAAGTTGGAAATCACGTGGATCAGAA<br>ACGAGT <b>CTACTTGCTGGAAGTGTACTTGG</b> 3'   |
| <i>rgef-1</i>  | WRM0623bF10 | 5'GAAGATGATGATCTAGCAGATATTTTCATCTGCGTCATACCGTA<br>CCGCCTGA <b>GCTGTCTCATCCTACTTTAC</b> 3'<br><br>5'ATTCTTGCTAAAAATAAAGAGAGTGCAGAGAAAGAGATAGATG<br>GAGACAAA <b>CTACTTGCTGGAAGTGTACTTGG</b> 3' |
| <i>tbb-1</i>   | WRM0629cH08 | 5'CACTCGACGAGTTCGCCGGAGAAGGGGAGACATACGAGTCTG<br>AGCAATAA <b>GCTGTCTCATCCTACTTTAC</b> 3'<br><br>5'GTACAGGAAATTACGAAACGGGGCAGGATAATTTAGTGATTGA<br>TACACAGA <b>CTACTTGCTGGAAGTGTACTTGG</b> 3'   |
| <i>tbb-4</i>   | WRM066bH01  | 5'ACCGCCGACGACGAAGGCGAGTTTGATGAGCAGCATCAAGAT<br>GTGGAATAA <b>GCTGTCTCATCCTACTTTAC</b> 3'<br><br>5'TAATATGACAACTTTGGAAATTAGAAAAAACGTAGAAAATGA<br>ATTAAGC <b>CTACTTGCTGGAAGTGTACTTGG</b> 3'    |
| <i>tbb-5</i>   | WRM0641bB11 | 5'CTGCAGAGGAAGATGGAGAACTTGATGGAAGTATGGAGATG<br>CTGAATAG <b>GCTGTCTCATCCTACTTTAC</b> 3'<br><br>5'ATTTCAAGTTTTTTTTTTCATAAATAATTGTTCAAATCATAGTTTTC<br>TATT <b>CTACTTGCTGGAAGTGTACTTGG</b> 3'    |
| <i>cho-1</i>   | WRM0613dC12 | 5'TATTACATCCATATTCGACCAAAGTTATTATTCCACAAATAGC<br>AATTA <b>GCTGTCTCATCCTACTTTAC</b> 3'<br><br>5'AAAAATTTGGGAGGAAATTAAGTGAACACGTGGAACAAGTTC<br>GTCTCTT <b>CTACTTGCTGGAAGTGTACT</b> 3'          |

#### Fosmid deletion analysis

| GENE | FOSMID/ | PRIMERS FOR RECOMBINEERING |
|------|---------|----------------------------|
|------|---------|----------------------------|

|                                                                                        | pBALU tagged with                                   | (target sequence) FRT GaIK<br>Lox2272 GaIK                                                                                                                                                                                                                                                                                                                                                                                                                |
|----------------------------------------------------------------------------------------|-----------------------------------------------------|-----------------------------------------------------------------------------------------------------------------------------------------------------------------------------------------------------------------------------------------------------------------------------------------------------------------------------------------------------------------------------------------------------------------------------------------------------------|
| <i>gcy-5</i><br>ASE motif<br>deletion                                                  | WRM0630dC06/pB<br>ALU9 (a gift from<br>Tulsi Patel) | F1<br>5'TTAAAACTTCAAACATTAAGCAA <b>GAAGTTCCTATACTATTTGAAGA</b><br><b>ATAGGAACTTCCTGTTGACAATTAATC</b> 3'<br>R1<br>5'CTTTTTCTTTGAAACCATACGCA <b>GAAGTTCCTATTCTTCAAATAGT</b><br><b>ATAGGAACTTCGCGGCCGCTCTAGAAC</b> 3'<br>F2<br>5'TTGATGCAGATACCAACAAGATTAAACTTCAAACATTAAGCAAG<br>3'<br>R2<br>5'GATTATCTTCCCAATTTGCACCTTTTTCTTTGAAACCATACGCA3'<br>F2<br>5'GCTGGGTCCCACCGTCTTTTACTA <b>GAAGTTCCTATTCTCTAGAA</b><br><b>AGTATAGGAACTTCGCGGCCGCTCTAGAACTAG</b> 3' |
| <i>eat-4</i> POU<br>Homeodo<br>main motif<br>deletion                                  | WRM0623aF12 /<br>pBalu23                            | F1<br>5'AACCAAGCTTGTGTCAGAAGACAAGT <b>GAAGTTCCTATACTTTCTAGA</b><br><b>GAATAGGAACTTCCTGTTGACAATTAATC</b> 3'<br>R1<br>5'GCTGGGTCCCACCGTCTTTTACTA <b>GAAGTTCCTATTCTCTAGAA</b><br><b>AGTATAGGAACTTCGCGGCCGCTCTAGAACTAG</b> 3'<br>F2<br>5'TATCAAAAACCAGGCAGTGAGTCCTAGAACCAAGCTTGTGAGAA<br>GAC3'<br>R2<br>5'CTTTTTTATGATCTACTACTCACCGCGCTGGGTCCCACCGT3'                                                                                                         |
| <i>cho-1</i> AIY<br>motif<br>deletion                                                  | WRM0613dC12 /<br>pBalu23                            | F1<br>5'CAAATCCTTTCTTAAACTTGTTTGA <b>GAAGTTCCTATACTTTCTAG</b><br><b>AGAATAGGAACTTCCTGTTGACAATTAATC</b> 3'<br>R1<br>5'GAGGAGGATGAGCAAAGAGCAACG <b>GAAGTTCCTATTCTCTAGA</b><br><b>AAGTATAGGAACTTCGCGGCCGCTCTAGAACTAG</b> 3'<br>F2<br>5'CTTGACAAAACATTTCCGCAGTTGCAAATCCTTTCTTAAACTTGT<br>TTGA3'<br>R2<br>5'TTTCGATGTGTGTATGGAAAGAGAGGAGGATGAGCAAAGA<br>GCAACG3'                                                                                               |
| <i>cho-1</i><br>COE motif<br>mutation<br>(mutated<br>nucleotide<br>s shown in<br>bold) | WRM0613dC12 /<br>pBalu23                            | F1<br>5'TCTTCCTGCTCCTCTTCTACCATCAC <b>GAAGTTCCTATACTTTCTA</b><br><b>GAGAATAGGAACTTCCTGTTGACAATTAATC</b> 3'<br>R1<br>5' <b>GG</b> CTGGAGACCGTTTTTGTGTCGTT <b>GAAGTTCCTATTCTCTAGAA</b><br><b>AGTATAGGAACTTCGCGGCCGCTCTAGAACTAG</b> 3'<br>F2<br>5'GAATGATGTATACACGAGAAGCTGCTCTTCTGCTCCTCTTCTAC<br>CATCA3'<br>R2<br>5'CTATCCTCCCTCTTCTCATTCTCT <b>GG</b> CTGGAGACCGTTTTTGTG<br>TCGTT3'                                                                        |
| <i>ric-4</i><br><i>deletion 1</i>                                                      | WRM0640cB04 /<br>pBalu23                            | F1<br>5'CCATTTGAAAGTTGTAATTTTAT <b>ATAACTTCGTATAGGATACTTT</b><br><b>ATACGAAGTTATCCTGTTGACAATTAATC</b> 3'                                                                                                                                                                                                                                                                                                                                                  |

|                                                              |                          |                                                                                                                                                                                                                                                                                                                                                                                                             |
|--------------------------------------------------------------|--------------------------|-------------------------------------------------------------------------------------------------------------------------------------------------------------------------------------------------------------------------------------------------------------------------------------------------------------------------------------------------------------------------------------------------------------|
|                                                              |                          | <p>R1<br/>5'GGGAGCGCCGCGCCGAGCCGACATATAACTTCGTATAAAGTATC<br/>CTATACGAAGTTATCGGGCCGCTCTAGAACT3'</p> <p>F2<br/>5'TTGGGAGCTAGTTTATTTTAAATCAACCATTTGAAAGTTGTAAT<br/>TTTATATAACTTCG3'</p> <p>R2<br/>5'CGGCATACGGACGGGGATGCCGTTGGCCGCCGGGAGCGCCGC<br/>GCCGAGCCGACATATAACTTCG3'</p>                                                                                                                                |
| <i>ric-4</i><br>deletion 2                                   | WRM0640cB04 /<br>pBalu23 | <p>F1<br/>5'ATAAGTTCATTAGCTAAAAAATGAAGTTCCTATACTTTCTAGAG<br/>AATAGGAACTTCCTGTTGACAATTAATC3'</p> <p>R1<br/>5'GCAAACAAAATCTCTTCCAAAATAGAAGTTCCTATTCTCTAGAA<br/>AGTATAGGAACTTCGCGGCCGCTCTAGAAC3'</p> <p>F2<br/>5'AATAAAGTTGTCTTATCCCACTATGTATAAGTTCATTAGCTAAAA<br/>AAATGAAG3'</p> <p>R2<br/>5'CTAGAACATTTTTATTGGAAAACAAAATTTTGCAAACAAAATCTC<br/>TTCCAAAATAGAAG3'</p>                                           |
| <i>snb-1</i><br>deletion of<br><i>prom28</i><br>(29bp)       | WRM065cH10 /<br>pBalu23  | <p>F1<br/>5'TCATAATGCCAGTACGCAAATGTGAAGTTCCTATACTTTCTAG<br/>AGAATAGGAACTTCCTGTTGACAATTAATC3'</p> <p>R1<br/>5'CGATGAATGGAAATCAATGAGAGA GAAGTTCCTATTCTCTAGAA<br/>AGTATAGGAACTTCGCGGCCGCTCTAGAACTAG3'</p> <p>F2<br/>5'ATCCCGAAATAGAGATGCGCGTAGGTCATAATGCCAGTACGCA<br/>AAATGT3'</p> <p>R2<br/>5'TAAGAAATGGGGTCAGATGACGAAGCGATGAATGGAAATCAAT<br/>GAGAGA3'</p>                                                    |
| <i>snb-1</i><br>deletion of<br><i>prom17</i>                 | WRM065cH10 /<br>pBalu23  | <p>F1<br/>5'TGAAAGTGAATGGATGACGGTCATATAACTTCGTATAGGATACTT<br/>TATACGAAGTTATCCTGTTGACAATTAATC3'</p> <p>R1<br/>5'ATGAAAAATAAGAAATGGGGTCAATAACTTCGTATAAAGTATCC<br/>TATACGAAGTTATCGGGCCGCTCTAGAACT3'</p> <p>F2<br/>5'CATTTCAATTTATTTATTAATCGATGATTGAAAGTGAATGGATGAC<br/>GGTCATATAACTTCGTATAGGATAC3'</p> <p>R2<br/>5'GTAAGGAACGATGAGAACAGGGAAAAGGATGAAAAATAAGAAA<br/>TGGGGTCAATAACTTCGTATAAAG3'</p>              |
| <i>snb-1</i><br>deletion of<br><i>prom1+pr</i><br><i>om9</i> |                          | <p>F1<br/>5'GAAGTATGCATTTTGTGTGCA GAAGTTCCTATACTTTCTAGAGAA<br/>TAGGAACTTCCTGTTGACAATTAATC3'</p> <p>R1<br/>5'GTCGGCGAGTATGTGTGTGTGCGAAGTTCCTATTCTCTAGAAAG<br/>TATAGGAACTTCGCGGCCGCTCTAGAACTAG3'</p> <p>F2<br/>5'CTGAAATGATGCTTCGTTTGTGGACACTGGAGCCGTTTGAAGTA<br/>TGCATTTTGTGTGCA GAAGTTCCTATACTTTCT3'</p> <p>R2<br/>5'GCAGTAGCACAAGGATTATATGGGCAAAGAAGACGTCGGCGAG<br/>TATGTGTGTGTGCGAAGTTCCTATTCTCTAGA3'</p> |



**pBALU23: TagRFP-SL2-NLS-YFP-FGF\*-YFP-H2B**

ATGGTGTCTAAGGGCGAAGAGCTGATTAAGGAGAACATGCACATGAAGCTGTACATGGA  
GGGCACCGTGAACAACCACCTTCAAGTGCACATCCGAGGGCGAAGGCAAGCCCTAC  
GAGGGCACCCAGACCATGAGAATCAAGGTGGTTCGAGGGCGGCCCTCTCCCCTTCGCCT  
TCGACATCCTGGCTACCAGCTTCATGTACGGCAGCAGAACCTTCATCAACCACACCCAG  
GGCATCCCCGACTTCTTTAAGCAGTCCTTCCCTGAGGGCTTCACATGGGAGAGAGTCAC  
CACATACGAAGACGGGGGCGTGCTGACCGCTACCCAGGACACCAGCCTCCAGGACGG  
CTGCCTCATCTACAACGTCAAGATCAGAGGGGTGAACTTCCCATCCAACGGCCCTGTGA  
TGCAGAAGAAAACACTCGGCTGGGAGGCCAACACCGAGATGCTGTACCCCGCTGACGG  
CGGCCTGGAAGGCAGAACCGACATGGCCCTGAAGCTCGTGGGCGGGGGCCACCTGAT  
CTGCAACTTCAAGACCACATACAGATCCAAGAAACCCGCTAAGAACCTCAAGATGCCCG  
GCGTCTACTATGTGGACCACAGACTAGAAAGAATCAAGGAGGCCGACAAAGAGACCTAC  
GTCGAGCAGCAGAGGTGGCTGTGGCCAGATACTGCGACCTCCCTAGCAAACCTGGGGC  
ACAACTTAATTAAGTCGACCGCGGCTGTCTCATCCTACTTTCACCTAGTTAACTGCTTG  
TCTTAAATCTATGCTTCTCTTTAGTATCTAAAATTTTCTAGAAGCTTACAAGTATATAA  
TGGTCTCTTCTCAATAAAGGTTGTATATTTATTCATCTTATTGAATCTGCCATTTCTCGTT  
TTTGGAGTTTATATACCTTCCAATTTTCTTTCTATTGTATTTTCAACTTCTAATTTAATTC  
AGGGAACTGCTTCAACGCATCATGACCGCTCCAAAGAAGAAACGCAAAGTACCGGTAG  
AAAAATGAGTAAAGGAGAAGAACTTTTCACTGGAGTTGTCCCAATTCTTGTGATTAG  
ATGGTGATGTTAATGGGCACAAATTTTCTGTCAGTGGAGAGGGTGAAGGTGATGCAACA  
TACGGAAAACCTACCCTTAAATTTATTTGCACTACTGGAAAACCTACCTGTTCCATGGGTAA  
GTTTAAACATATATACTAACTAACCTGATTATTTAAATTTTTCAGCCAACACTTGTCACT  
ACTTTCGGTTATGGTCTTCAATGCTTCGCCAGATACCCAGATCATATGAAACAGCATGAC  
TTTTTCAAGAGTGCCATGCCCGAAGGTTATGTACAGGAAAGAAGCTATATTTTTCAAAGAT  
GACGGGAACTACAAGACAGTAAAGTTTAAACAGTTCGGTACGAAGTTCCTATACTATTTG  
AAGAATAGGAACTTCCCTGTTGACAATTAATCATCGGCATAGTATATCGGCATAGTATAA  
TACGACAAGGTGAGGAACTAAACCCAGGAGGCAGATCATGAGTCTGAAAGAAAAAACAC  
AATCTCTGTTTGCCAACGCATTTGGCTACCCTGCCACTCACACCATTGAGGCGCCTGGC  
CGCGTGAATTTGATTGGTGAACACACCGACTACAACGACGGTTTCGTTCTGCCCTGCGC  
GATTGATTATCAAACCGTGATCAGTTGTGCACCACGCGATGACCGTAAAGTTCGCGTGA  
TGGCAGCCGATTATGAAAATCAGCTCGACGAGTTTTCCCTCGATGCGCCCATTGTCGCA  
CATGAAAACATCAATGGGCTAACTACGTTTCGTGGCGTGGTGAACATCTGCAACTGCG  
TAACAACAGCTTCGGCGGCGTGGACATGGTGTGATCAGCGGCAATGTGCCGCAGGGTGCC  
GGGTTAAGTTCTTCCGCTTCACTGGAAGTCGCGGTCCGAACCGTGTTCAGCAGCTTTA  
TCATCTGCCGCTGGACGGCGCACAAATCGCGCTTAAACGGTCAGGAAGCAGAAAACCAG  
TTTGTAGGCTGTAAGTGCAGGATCATGGATCAGCTAATTTCCGCGCTCGGCAAGAAAGA  
TCATGCCTTGCTGATCGATTGCCGCTCACTGGGGACCAAAGCAGTTTCCATGCCCAAAG  
GTGTGGCTGTCGTCATCATCAACAGTAACTTCAAACGTACCCTGGTTGGTAGCGAATAC  
AACACCCGTCGTGAACAGTGCGAAACCGGTGCGCGTTTCTTCCAGCAGCCAGCCCTGC  
GTGATGTCACCATTGAAGAGTTCAACGCTGTTGCGCATGAACTGGACCCGATCGTGACA  
AAACGCGTGCGTCATATACTGACTGAAAACGCCCGCACCGTTGAAGCTGCCAGCGCGC  
TGGAGCAAGGCGACCTGAAACGTATGGGCGAGTTGATGGCGGAGTCTCATGCCTCTAT  
GCGCGATGATTTGAAAATCACCGTGCCGCAAATGACACTCTGGTAGAAAATCGTCAAAG  
CTGTGATTGGCGACAAAGGTGGCGTACGCATGACCGGCGGCGGATTGGCGGCTGTAT  
CGTCGCGCTGATCCCGGAAGAGCTGGTGCCTGCCGTACAGCAAGCTGTCGCTGAACAA  
TATGAAGCAAAAACAGGTATTAAGAGACTTTTTACGTTTGTAAACCATCACAAGGAGCA  
GGACAGTGCTGAGGATCCACTAGTTCTAGAGCGGCCGCGAAGTTCCTATACTATTTGAA

GAATAGGAACTTCTAACTAACCATACATATTTAAATTTTCAGGTGCTGAAGTCAAGTTTGA  
 AGGTGATACCCTTGTTAATAGAATCGAGTTAAAAGGTATTGATTTTAAAGAAGATGGAAA  
 CATTCTTGGACACAAATTGGAATACAACATAACTCACACAATGTATACATTATGGCAGAC  
 AAACAAAAGAATGGAATCAAAGTTGTAAGTTTAAACATGATTTTACTAACTAACTAATCTG  
 ATTTAAATTTTCAGAACTTCAAATAGACACAACATTGAAGATGGAAGCGTTCAACTAGC  
 AGACCATTATCAACAAAATACTCCAATTGGCGATGGCCCTGTCCTTTTACCAGACAACCA  
 TTACCTGTCCTACCAATCTGCCCTTTCGAAAGATCCCAACGAAAAGAGAGACCACATGGT  
 CCTTCTTGAGTTTGTAAACAGCTGCTGGGATTACACATGGCATGGATGAACTATACAAACC  
 ACCAAAGCCATCTGCCAAGGGAGCCAAGAAGGCCGCCAAGACCGTTACGAAGCCAAAG  
 GACGGAAAGAAGAGACGTCATGCCCGTAAGGAATCATACTCCGTCTACATCTACCGTGT  
 CCTCAAGCAAGTTCATCCAGACACTGGAGTTTCTCCAAAGCCATGTCTATCATGAACTC  
 TTTTGTCAACGATGTCTTCGAGCGTATTGCTGCTGAAGCATCCCGTCTTGCTCACTACAA  
 CAAGCGTTCCACAATCTCATCCCGCGAAATTCAGACCGCTGTCCGTCTGATCCTTCCAG  
 GAGAGCTTGCCAAGCACGCCGTGTCTGAGGGAACCAAGGCCGTTACCAAGTACACTTC  
 CAGCAAGTAG

- ..... TagRFP
- ..... SL2 (*gpd-2* intergenic region)
- ..... 1XNLS
- ..... YFP
- ..... intron
- ..... FRT\*
- ..... GALK
- ..... H2B

**pBALUNI: NLS-YFP-FGF\*-YFP-H2B-SL2**

ATGACCGCTCCAAAGAAGAAACGCAAAGTACCGGTAGAAAAAATGAGTAAAGGAGAAGA  
 ACTTTTCACTGGAGTTGTCCCAATTCTTGTTGAATTAGATGGTGATGTTAATGGGCACAA  
 ATTTTCTGTCAGTGGAGAGGGTGAAGGTGATGCAACATACGGAAAACCTTACCCTTAAATT  
 TATTTGCACTACTGGAAAACCTGTTCCATGGGTAAGTTTAAACATATATACTAACT  
 AACCTGATTATTTAAATTTTCAGCCAACACTTGTCACTACTTTCGGTTATGGTCTTCAAT  
 GCTTCGCCAGATACCCAGATCATATGAAACAGCATGACTTTTTCAAGAGTGCCATGCC  
 GAAGGTTATGTACAGGAAAGAACTATATTTTTCAAAGATGACGGGAACTACAAGACACGT  
 AAGTTTAAACAGTTCGGTACGAAGTTCCTATACTATTTGAAGAATAGGAACTTCCCTGTT  
 GACAATTAATCATCGGCATAGTATATCGGCATAGTATAATACGACAAGGTGAGGAACTAA  
 ACCCAGGAGGCAGATCATGAGTCTGAAAGAAAAACACAATCTCTGTTTGCCAACGCAT  
 TTGGCTACCCTGCCACTCACACCATTAGGCGCCTGGCCGCGTGAATTTGATTGGTGAA  
 CACACCGACTACAACGACGGTTTCGTTCTGCCCTGCGCGATTGATTATCAAACCGTGAT  
 CAGTTGTGCACCACGCGATGACCGTAAAGTTCGCGTGATGGCAGCCGATTATGAAAATC  
 AGCTCGACGAGTTTTCCCTCGATGCGCCATTGTGCGACATGAAAACATCAATGGGCT  
 AACTACGTTTCGTGGCGTGGTGAACATCTGCAACTGCGTAACAACAGCTTCGGCGGCGT  
 GGACATGGTGATCAGCGGCAATGTGCCGCAGGGTGCCGGGTTAAGTTCTTCCGCTTCA  
 CTGGAAGTCGCGGTCCGAACCGTATTGCAGCAGCTTTATCATCTGCCGCTGGACGGCG  
 CACAAATCGCGCTTAACGGTCAGGAAGCAGAAAACAGTTTGTAGGCTGTAACCTGCGGG  
 ATCATGGATCAGCTAATTTCCGCGCTCGGCAAGAAAGATCATGCCTTGCTGATCGATTG  
 CCGCTCACTGGGGACCAAAGCAGTTTCCATGCCCAAAGGTGTGGCTGTCGTCATCATCA

ACAGTAACTTCAAACGTACCCTGGTTGGCAGCGAATACAACACCCGTCGTGAACAGTGC  
 GAAACCGGTGCGCGTTTCTTCCAGCAGCCAGCCCTGCGTGATGTCACCATTGAAGAGTT  
 CAACGCTGTTGCGCATGAACTGGACCCGATCGTGGCAAACGCGTGCGTCATACTGA  
 CTGAAAACGCCCGCACCGTTGAAGCTGCCAGCGCGCTGGAGCAAGGCGACCTGAAACG  
 TATGGGCGAGTTGATGGCGGAGTCTCATGCCTCTATGCGCGATGATTTCGAAATCACCG  
 TGCCGCAAATTGACACTCTGGTAGAAATCGTCAAAGCTGTGATTGGCGACAAAGGTGGC  
 GTACGCATGACCGGCGGCGGATTTGGCGGCTGTATCGTCGCGCTGATCCC GGAAGAGC  
 TGGTGCCTGCCGTACAGCAAGCTGTGCGCTGAACAATATGAAGCAAAAACAGGTATTA  
 GAGACTTTTTACGTTTGTAACCATCACAAGGAGCAGGACAGTGCTGAGGATCCACTAG  
 TTCTAGAGCGGCCGCGAAGTTCCTATACTATTTGAAGAATAGGAACTTCTAACTAACCAT  
 ACATATTTAAATTTTCAGGTGCTGAAGTCAAGTTTGAAGGTGATACCCTTGTTAATAGAAT  
 CGAGTTAAAAGGTATTGATTTTAAAGAAGATGGAACATTCTTGGACACAAATTGGAATA  
 CAACTATAACTCACACAATGTATACATTATGGCAGACAAACAAAAGAATGGAATCAAAGT  
 TGTAAGTTTAAACATGATTTTACTAACTAACTAATCTGATTTAAATTTTCAGAACTTCAAAA  
 TTAGACACAACATTGAAGATGGAAGCGTTCAACTAGCAGACCATTATCAACAAAATACTC  
 CAATTGGCGATGGCCCTGTCCTTTTACCAGACAACCATTACCTGTCCTACCAATCTGCC  
 TTTCGAAAGATCCCAACGAAAAGAGAGACCACATGGTCTTCTTGAGTTTGTAACAGCTG  
 CTGGGATTACACATGGCATGGATGAACTATAAAA CCACCAAAGCCATCTGCCAAGGGA  
 GCCAAGAAGGCCGCCAAGACCGTTACGAAGCCAAAGGACGGAAAGAAGAGACGTCATG  
 CCCGTAAGGAATCATACTCCGTCTACATCTACCGTGTCTCAAGCAAGTTCATCCAGACA  
 CTGGAGTTTCTCCAAAGCCATGTCTATCATGAACTCTTTTGTCAACGATGTCTTCGAGC  
 GTATTGCTGCTGAAGCATCCCGTCTTGCTCACTACAACAAGCGTTCACAATCTCATCCC  
 GCGAAATTCAGACCGCTGTCCGTCTGATCCTTCCAGGAGAGCTTGCCAAGCACGCCGT  
 GTCTGAGGGAACCAAGGCCGTTACCAAGTACACTTCCAGCAAGTAGGCTGTCTCATCCT  
 ACTTTCACCTAGTTAACTGCTTGTCTTAAATCTATGCTTCTCTTTAGTATCTAAAATTTT  
 CTAGAAGCTTACAAGTATATAAATGGTCTCTTCTCAATAAAGGTTGTATATTTATTCATCTT  
 ATTGAATCTGCCATTTCTCGTTTTTGGGAGTTTATATACCTTCCAATTTCTTTCTATTGT  
 ATTTTCAACTTCTAATTTTAATTCA

- 1x NLS
- YFP
- introns
- FRT\*
- GalK
- H2B
- SL2 (*gpd-2* intergenic region)

## **Generation of other reporter constructs**

All reporter gene fusions for *cis*-regulatory analysis (except *rab-3prom1* transcriptional reporter) were generated using a PCR fusion approach (Hobert, 2002). Genomic fragments were fused to a nuclearly localized 2xNLS-TagRFP coding sequence, which was followed by the *unc-54* 3' untranslated region. PCR fusion DNA fragments were injected as simple extrachromosomal arrays in a *pha-1(e2123)* mutant background strain that harbors an integrated array of the *rab-3prom1::2xNLS-YFP(otIs287* or *otIs291)* in the following concentrations: *cis*- regulatory element ("prom") construct 50ng/μL, *pha-1* rescuing plasmid pBX 50ng/μL.

For those *cis*-element where changes in the sequence were introduced, the PCR-fusion consisting of the *cis*-element and the fluorescent reporter were first cloned into TA cloning vectors (INVITROGEN) and sequenced. Mutagenesis was performed using the QuikChange II XL Site-Directed Mutagenesis Kit (Stratagene). The new "PCR-fusion" was amplified from the mutagenized plasmid and the amplicon injected in worms as described above for all other fusions.

The *rab-3prom1* reporter (**Fig.1E**; **Fig.S3**) was cloned adding PstI and BamHI restriction sites to primers F 5'GCGAGTTTTGACTGGCTTTC 3' and R 5'CTGAAAATAGGGCTACTG 3' and cloned into pPD95.67 vector containing 2xNLS-*yfp* and the *unc-54* 3'UTR.

Integrated constructs *rab-3prom1::2xNLS-YFP (otIs287* [IV], *otIs291* [V]), *rab-3prom1::2xNLS::TagRFP (otIs355* [IV], *otIs356* [V]), *ric-4prom4::2xNLS::GFP (otIs489* [X], *otIs490* [IV]), *ric-4prom17::2xNLS::GFP (otIs414, otIs420-otIs424)*, *snb-1prom17::2xNLS::GFP (otIs419)*, *ric-19prom6 (otIs380, otIs381* [V]), and *ehs-1prom4::2xNLS::GFP (otIs501)* were generated by gamma irradiation and outcrossed four to eight times.

## Supplemental References

Bruce, A.W., Donaldson, I.J., Wood, I.C., Yerbury, S.A., Sadowski, M.I., Chapman, M., Gottgens, B., and Buckley, N.J. (2004). Genome-wide analysis of repressor element 1 silencing transcription factor/neuron-restrictive silencing factor (REST/NRSF) target genes. *Proc Natl Acad Sci U S A* *101*, 10458-10463.

Hwang, S.B., and Lee, J. (2003). Neuron cell type-specific SNAP-25 expression driven by multiple regulatory elements in the nematode *Caenorhabditis elegans*. *Journal of molecular biology* *333*, 237-247.

Jarriault, S., and Greenwald, I. (2002). Suppressors of the egg-laying defective phenotype of *sel-12* presenilin mutants implicate the CoREST corepressor complex in LIN-12/Notch signaling in *C. elegans*. *Genes Dev* *16*, 2713-2728.

Lakowski, B., Eimer, S., Gobel, C., Bottcher, A., Wagler, B., and Baumeister, R. (2003). Two suppressors of *sel-12* encode C2H2 zinc-finger proteins that regulate presenilin transcription in *Caenorhabditis elegans*. *Development* *130*, 2117-2128.

Laugesen, A., and Helin, K. (2014). Chromatin repressive complexes in stem cells, development, and cancer. *Cell Stem Cell* *14*, 735-751.

Lu, T., Aron, L., Zullo, J., Pan, Y., Kim, H., Chen, Y., Yang, T.H., Kim, H.M., Drake, D., Liu, X.S., *et al.* (2014). REST and stress resistance in ageing and Alzheimer's disease. *Nature* *507*, 448-454.

Ruvinsky, I., Ohler, U., Burge, C.B., and Ruvkun, G. (2007). Detection of broadly expressed neuronal genes in *C. elegans*. *Developmental biology* *302*, 617-626.

Tursun, B., Cochella, L., Carrera, I., and Hobert, O. (2009). A toolkit and robust pipeline for the generation of fosmid-based reporter genes in *C. elegans*. *PLoS one* *4*, e4625.
